# Supplementary material for: H2/CO2 separations in multicomponent metal-adeninate MOFs with multiple chemically distinct pore environments
Source: Royal Society of Chemistry journal article supplement (doi:10.1039/d0sc04979d), 2020-01-01
Supplement: d0sc04979d1.pdf [file d0sc04979d1.pdf]

Supporting Information for  
**H<sub>2</sub>/CO<sub>2</sub> Separations in Multicomponent Metal-Adeninate MOFs with  
Multiple Chemically Distinct Pore Environments**

Zachary M. Schulte<sup>a</sup>, Yeon Hye Kwon<sup>a</sup>, Yi Han<sup>a</sup>, Chong Liu,<sup>a</sup> Lin Li<sup>b</sup>, Yahui Yang<sup>b</sup>,  
Austin Gamble Jarvi,<sup>a</sup> Sunil Saxena,<sup>a</sup> Götz Vesper<sup>b</sup>, J. Karl Johnson<sup>b</sup>, and  
Nathaniel L. Rosi<sup>a,b,c,d,\*</sup>

<sup>a</sup> Department of Chemistry, University of Pittsburgh, Pittsburgh, Pennsylvania 15260,  
United States

<sup>b</sup> Department of Chemical and Petroleum Engineering, University of Pittsburgh,  
Pittsburgh, Pennsylvania 15260, United States

<sup>c</sup> U.S. Department of Energy, National Energy Technology Laboratory, Pittsburgh,  
Pennsylvania 15236, United States

<sup>d</sup> Oak Ridge Institute for Science and Education, Pittsburgh, Pennsylvania 15236,  
United States

## Contents:

|                                                                            |     |
|----------------------------------------------------------------------------|-----|
| 1. General procedures.....                                                 | S4  |
| 1.1 Materials.....                                                         | S4  |
| 1.2 General characterization techniques.....                               | S4  |
| 2. Material preparation and characterization.....                          | S8  |
| 2.1 Synthesis and characterization of <b>as-synthesized bMOF-200</b> ..... | S8  |
| 2.2 Solvent exchange procedures.....                                       | S15 |
| 2.3 Synthesis and characterization of <b>bMOF-201</b> .....                | S20 |
| 3. Gas adsorption studies.....                                             | S25 |
| 3.1 Activation of <b>MeOH-bMOF-200</b> .....                               | S25 |
| 3.2 Gas adsorption isotherms.....                                          | S25 |
| 4. Computational methods.....                                              | S28 |
| 4.1 Computational methodology.....                                         | S30 |
| 4.2 Density functional theory (DFT) details.....                           | S31 |
| 5. Breakthrough experiments.....                                           | S32 |
| 5.1 Description of breakthrough experiments.....                           | S32 |
| 5.2 Synthesis and characterization of reference MOFs.....                  | S33 |
| 6. Membrane fabrication and gas separation studies.....                    | S35 |
| 6.1 Fabrication of <b>MeOH-bMOF-200</b> Membranes.....                     | S35 |
| 6.2 Fabrication of <b>bMOF-201</b> Membranes.....                          | S35 |
| 6.3 Membrane Characterization.....                                         | S36 |
| 6.4 Experimental Setup.....                                                | S38 |

|                                                     |     |
|-----------------------------------------------------|-----|
| 7. Crystallographic tables.....                     | S41 |
| 7.1 Tables for <b>as-synthesized bMOF-200</b> ..... | S41 |
| 7.2 Tables for <b>MeOH-bMOF-200</b> .....           | S50 |
| 7.3 Tables for <b>bMOF-201</b> .....                | S59 |

## 1. General procedures

### 1.1 Materials

Zn(NO<sub>3</sub>)<sub>2</sub>·4H<sub>2</sub>O, Zn(COOCH<sub>3</sub>)<sub>2</sub>·2H<sub>2</sub>O, Cu(NO<sub>3</sub>)<sub>2</sub>·2.5H<sub>2</sub>O, Cu(Cl)<sub>2</sub> (anhydrous), dimethylformamide (DMF), 70% HBF<sub>4</sub>, and acetic acid were purchased from Sigma-Aldrich. Adenine and ZnCl<sub>2</sub> (anhydrous) were purchased from Alfa-Aesar. Methanol was purchased from Fisher Scientific. 4-pyrazolecarboxylic acid (H<sub>2</sub>-pyz) was purchased from Accela. NANOpure<sup>®</sup> (Thermo Scientific, > 18.2 MΩ · cm) water was used in the synthesis of all MOFs. All purchased chemicals were used without further purification except where otherwise noted.

### 1.2 General characterization techniques

**<sup>1</sup>H nuclear magnetic resonance (NMR) spectra** were obtained using a Bruker Advance 500 MHz spectrometer. Chemical shifts are in parts per million using the residual solvent peak (DMSO-d<sub>6</sub>, 2.5 ppm) as reference. To prepare MOF samples for NMR, approximately 1 mg of dried MOF sample was placed in a 1.5 mL Eppendorf centrifuge tube. One gram of DMSO-d<sub>6</sub> was added, followed by 8 μL of DCI in D<sub>2</sub>O to digest the MOF crystals. Once the crystals were fully digested, the solution became slightly yellow. NOTE: If excess acid is used, the peak corresponding to 4-pyrazolecarboxylic acid shifts downfield and can overlap with the doublet corresponding to adenine causing erroneous integrations. To avoid this, we have found that using the minimum amount of acid to achieve a slightly yellow solution is ideal. Excess acid results in bright yellow solutions and peak overlap.

**Attenuated total reflectance Fourier-transform infrared spectrometry (ATR-FT-IR)**

was conducted using a PerkinElmer Spectrum Two spectrometer with diamond/ZnSe ATR accessory. All spectra were collected using a LiTaO<sub>3</sub> MIR detector over a range of 450 to 4000 cm<sup>-1</sup>. All spectra were processed using Spectrum 10 software.

**Powder X-ray diffraction (PXRD)** patterns were collected using a Bruker AXS D8 Discover powder diffractometer at 40 kV, 40 mA for Cu K $\alpha$ , ( $\lambda$ = 1.5406 Å) with a scan speed of 0.20 sec/step from 3.0 to 40° at a step size of 0.02°. The data were analyzed using the EVA program from the Bruker Powder Analysis Software package. The simulated powder patterns were calculated using Mercury based on single crystal diffraction data of corresponding MOFs.

**N<sub>2</sub> gas adsorption isotherms were collected on a Micromeritics 3-flex gas adsorption analyzer.** All samples used with this instrument were activated under the specified conditions on a Micromeritics SmartVacPrep under vacuum and heat. **CO<sub>2</sub> gas adsorption isotherms were collected on a Quantachrome Autosorb-1 instrument.**

For all experiments, approximately 20-50 mg of washed and/or solvent-exchanged sample was added into a pre-weighed sample analysis tube. A liquid N<sub>2</sub> bath was used for the N<sub>2</sub> adsorption experiments at 77 K. A dry ice/acetone bath was used for the CO<sub>2</sub> adsorption experiment at 195 K. Ultra-high purity grade N<sub>2</sub> and CO<sub>2</sub> gas cylinders (99.999 %) were used in this study.

**Thermogravimetric analyses (TGA)** were performed using a TGA Q500 thermal analysis system. All TGA experiments were performed under a N<sub>2</sub> atmosphere from about 20 °C to 800 °C at a rate of 1 °C /min. Data were analyzed using the TA Universal Analysis software package.

**X-ray photoelectron (XPS)** spectra were obtained using an ESCALAB 250XI XPS with a monochromated, micro-focused Al K $\alpha$  X-ray source (spot size = 600  $\mu$ m) before and after sputtering. Survey and high-resolution spectra were collected with a pass energy of 150 and 50 eV and a step size of 1.0 eV and 0.1 eV, respectively. The MOF samples also underwent an Ar ion sputtering (500 eV, 10 seconds) process to remove surface contaminants. Spectra were charge referenced to adventitious carbon (284.8 eV). Dry MOF samples were deposited onto p-doped (boron) silicon wafers (University Wafer, Boston, MA) that had been cleaned for ultra-high vacuum analysis.

**Electron paramagnetic resonance (EPR)** experiments were performed on a Bruker Elexsys E680 CW/FT X-band spectrometer using a Bruker ER4118X-MD5 resonator at 80 K. MOFs stored in DMF (<1mg) were aliquoted into a quartz sample tube of O.D. 4mm, I.D. 3mm. Continuous wave (CW)-EPR measurements were run with a center field of 3100 G, sweep width of 2000 G, modulation amplitude of 4 G, and a modulation frequency of 100 kHz for 1024 data points using a conversion time of 20.48 ms. All EPR simulations were performed using EasySpin software.<sup>1</sup>

**Scanning electron microscopy (SEM)** was conducted on a ZEISS Sigma500 VP operated at 1kV and was used to determine the crystal morphology and thickness of **bMOF-200** and **bMOF-201** membranes. For cross-sectional observation of membranes, alumina-supported membranes were broken into pieces and samples were mounted on 90 degrees specimen mount.

**Elemental microanalyses** were performed by the University of Illinois Urbana-Champaign Microanalysis Laboratory with an Exeter Analytical CE440. Inductively coupled plasma optical emission spectroscopy (ICP-OES) was used for metal concentration determination.

## 2. Synthesis and Characterization of as-synthesized bMOF-200

### 2.1 Synthesis of as-synthesized bMOF-200

The following stock solutions were prepared in DMF: 0.1 M  $\text{Zn}(\text{NO}_3)_2 \cdot 6\text{H}_2\text{O}$ , 0.1 M  $\text{ZnCl}_2$  (anhydrous), 0.1 M  $\text{CuCl}_2$  (anhydrous), 0.05 M adenine, 0.1 M  $\text{H}_2\text{-pyz}$ , and 0.1 M acetic acid. Stock solutions of adenine were heated and sonicated until fully dissolved. The reagents were added to a reaction tube with one end flame-sealed in the following order:  $\text{CuCl}_2$  (200  $\mu\text{L}$ ),  $\text{Zn}(\text{NO}_3)_2$  (300  $\mu\text{L}$ ),  $\text{ZnCl}_2$  (300  $\mu\text{L}$ ), adenine (250  $\mu\text{L}$ ),  $\text{H}_2\text{-pyz}$  (200  $\mu\text{L}$ ), acetic acid (200  $\mu\text{L}$ ), and nanopure water (275  $\mu\text{L}$ ). The mixture became dark blue after addition of adenine, and then returned to a lighter shade of blue upon addition of water. The reaction vessel was then connected to a rubber hose with a stop cock adapter, frozen in liquid nitrogen for three minutes, then evacuated to approximately 100 mbar. The vessels were then flame sealed, allowed to thaw at room temperature, then placed in a 105 °C oven for 48 hours. After cooling to room temperature, slightly yellow cubic crystals were collected with a Pasteur pipette, placed in a 20 mL glass scintillation vial and washed with fresh, dry DMF (3x, 10 mL). Upon washing, a color change was observed from slight yellow to green. After three days, the crystals were dried under a stream of  $\text{N}_2$  gas and further dried under vacuum using a Schlenk line for two hours. This product is notated as **as-synthesized bMOF-200**. Yield: 70% Anal. Calcd. (%): C, 32.15; H, 4.29; N, 20.45; Zn, 15.91; Cu, 7.73. Found: C, 32.12; H, 3.57; N, 19.72; Zn, 15.92; Cu, 7.26. Molecular Formula:  $\text{Zn}_2\text{Cu}(\text{4-pyz})_2(\text{ad})(\text{DMF}) \cdot (\text{DMF})_2,(\text{H}_2\text{O})_3$  (pyz = pyrazolate; ad = adeninate). Chemical Formula:  $\text{C}_{22}\text{H}_{35}\text{N}_{12}\text{O}_{10}\text{Zn}_2\text{Cu}$  FT-IR (4000-450 $\text{cm}^{-1}$ ): 3072 (br), 2930 (w), 2887 (br), 1674 (m), 1646 (s), 1622 (m), 1572 (m), 1537 (m), 1434 (m), 1413 (m), 1383 (m), 1281 (s), 1213 (m), 1092 (m), 1044 (m), 1005 (m), 798 (s).



**Determination of Composition:** Elemental analysis was used to determine the abundance of C, H, N, and Zn in a dried sample of **as-synthesized bMOF-200**. The data revealed a molecular formula of  $\text{Zn}_2\text{Cu}(\text{4-pyz})_2(\text{ad})(\text{DMF}) \cdot (\text{DMF})_2, (\text{H}_2\text{O})_3$  which closely matched the ratios of ligands, metals, and solvents observed in the refined crystal structure.  $^1\text{H-NMR}$  was conducted to confirm the relative amounts of the organic components and any solvent within the framework (**Figure S1**). The resulting spectra yielded a 4-pyz : adenine ratio of approximately 2 : 1 and three DMF molecules, as well as some water. TGA analysis was then used to determine the mass percent of solvents (DMF and water) in the dried material by measuring the change in mass with increasing temperature (**Figure S2**). The solvent molecules (3 water and 3 DMF) account for approximately 33% of the total mass. The TGA plot shows a 33% weight loss by 250°C, well above the boiling point of both compounds. We note that the small pore windows within **bMOF-200** may inhibit solvent loss. All three characterization methods agree well with the determined molecular formula. XPS was used to determine the oxidation state of the Cu in a MeOH exchanged sample (*vide infra*) of **bMOF-200** (**Figure S3**). The Cu spectrum was collected before and after a 10 second sputtering from an Ar ion beam to etch the surface of the crystals. Before any etching occurred, the Cu spectrum shows Cu(II) character as evidenced by a satellite peak centred at 943 eV. The loss of this satellite peak and a concurrent shift in the  $2p_{3/2}$  signal to lower binding energies in the post-etching spectrum indicate an increase in Cu (I) character, which suggests that surface oxidation occurs on bMOF-200 crystals, converting Cu (I) to Cu (II). We further investigated the Cu sites using EPR spectroscopy to gain insight into their coordination geometry (**Figure S4**). The spectrum for **as-synthesized bMOF-200** yielded an  $A_{\text{II}}$  value

of 144 which is within the range of values assigned to a square planar geometry. Finally, PXRD patterns showed a nearly identical match to the simulated powder pattern derived from the single crystal structure, indicating the phase purity of the compound (**Figure S5**).

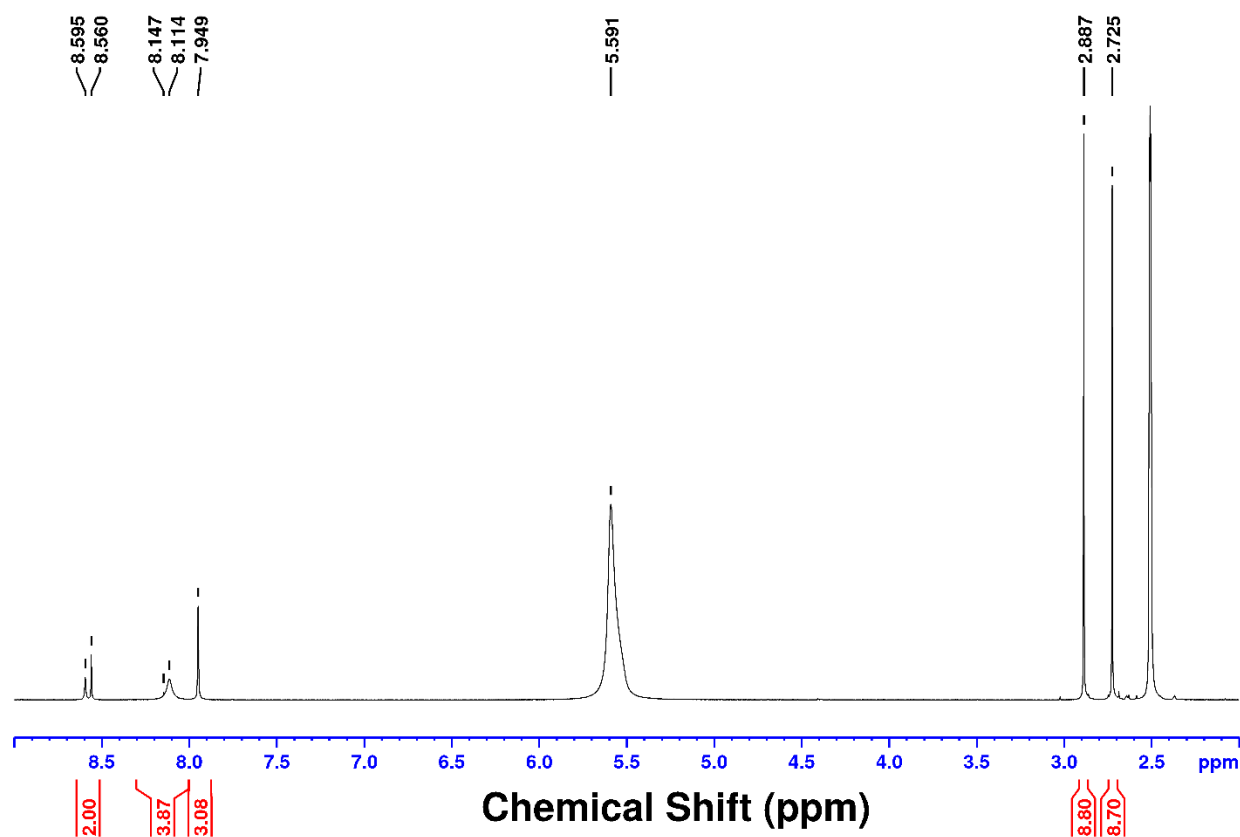

**Figure S1.**  $^1\text{H}$ -NMR spectrum of **as-synthesized bMOF-200** after washing with DMF and drying on a Schlenk line for 1 hour. The peaks at 8.57 ppm corresponds to adenine protons. The broad peak at 8.114 ppm is assigned to 4-pyz protons. The small peak at 8.147 ppm is due to a small amount of formate from the decomposition of DMF. Peaks at 7.95, 2.89, and 2.73 ppm correspond to DMF. The integration shows approximately three DMF molecules per adenine molecule.

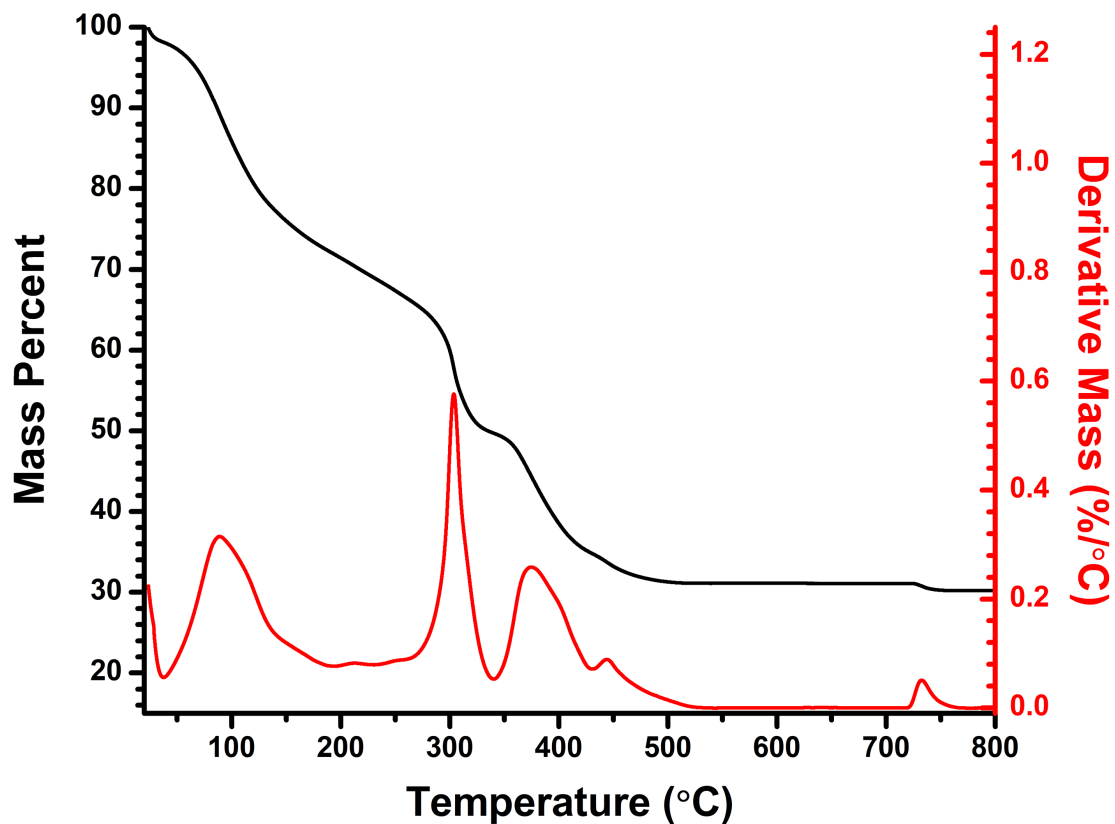

**Figure S2.** TGA of **as-synthesized bMOF-200**. The black curve shows the recorded weight loss with increasing temperature and the red curve is the first derivative weight loss with respect to temperature. ~33% of the sample weight is lost before 250 °C, which corresponds to 3 DMF and 3 H<sub>2</sub>O. Subsequent weight loss steps are ascribed to sample decomposition.

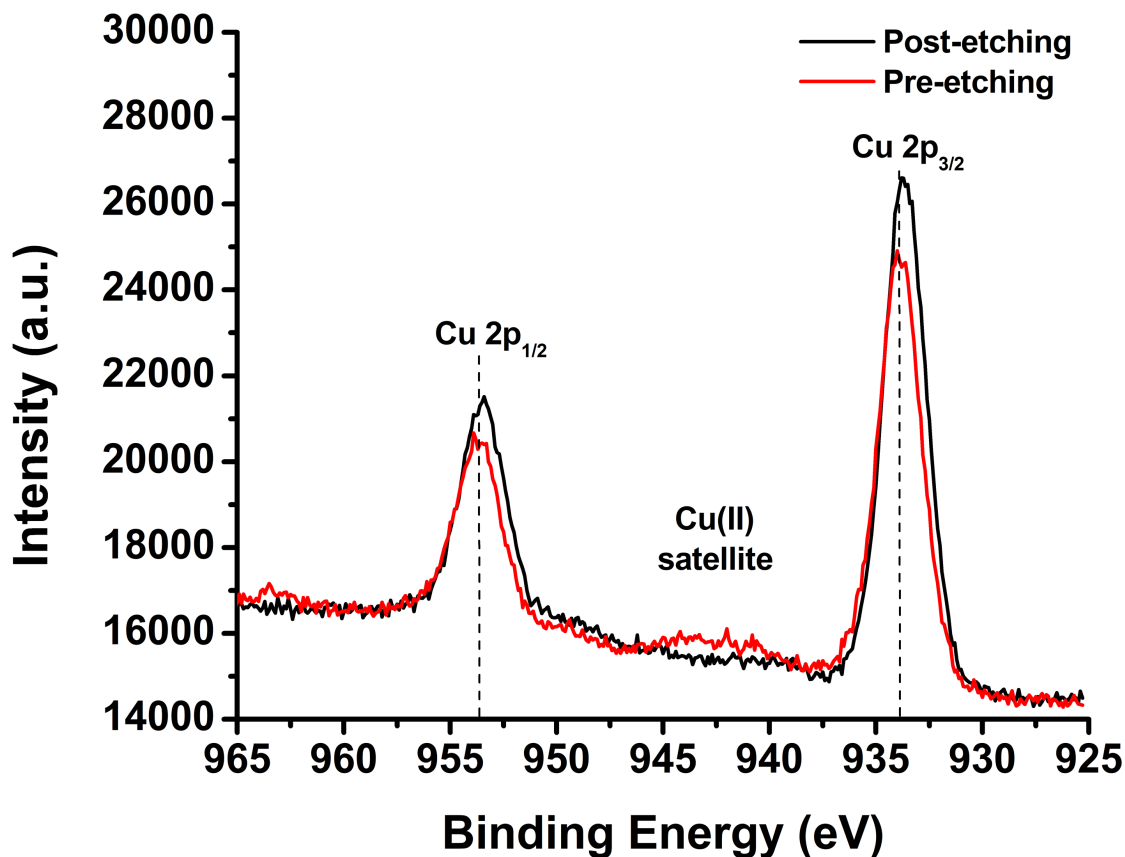

**Figure S3.** XPS of methanol-washed **bMOF-200** before (red) and after (black) surface etching with an Ar<sup>+</sup> beam. A slight shift in both Cu 2p<sub>1/2</sub> and Cu 2p<sub>3/2</sub> peaks to lower binding energies and the loss of the satellite peak between 945 and 940 eV indicate the presence of more Cu(I) character after etching. Therefore, we attribute the Cu(II) character primarily to surface oxidation of the MOF crystals in air.

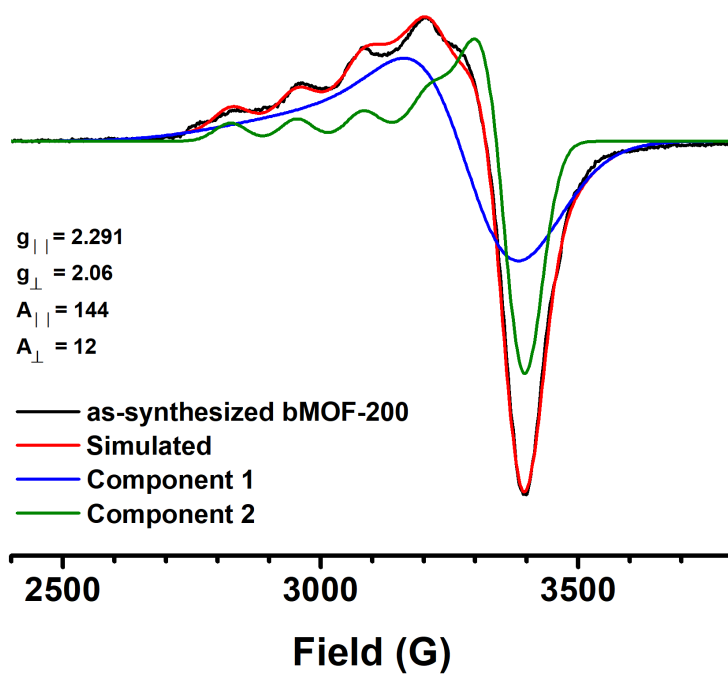

**Figure S4.** CW-EPR of **as-synthesized bMOF-200** with respective  $g$  and  $A$  tensor values. The simulated curve (red) is a combination of two separate simulated components: a broad, featureless signal (blue) and a signal with hyperfine splitting (green).

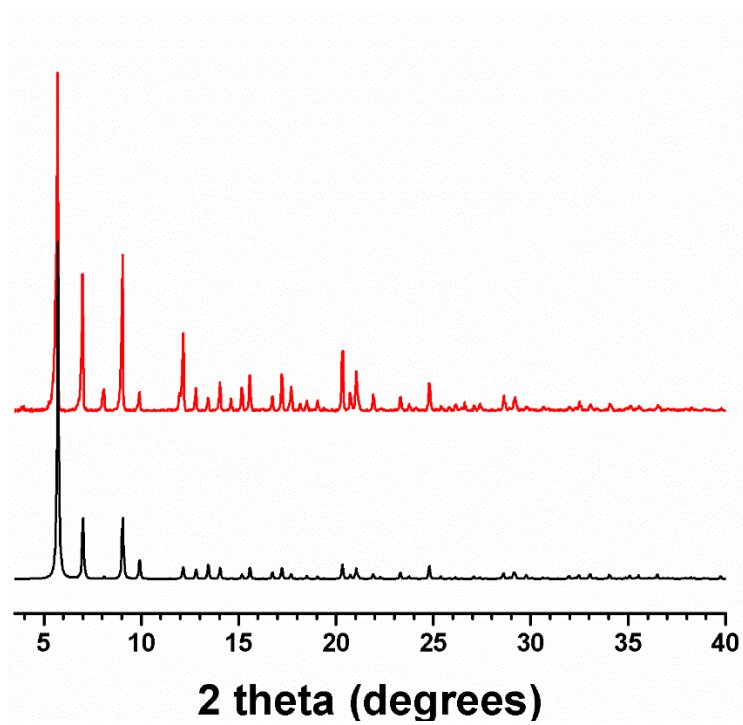

**Figure S5.** PXRD patterns of simulated (black) and **as-synthesized bMOF-200** (red). Simulated pattern was calculated from SC-XRD data.

## 2.2 Solvent exchange procedures

**As-synthesized bMOF-200** crystals soaking in DMF were exchanged with 10 mL of dry methanol three times a day for three days. Then, the crystals were dried under a N<sub>2</sub> stream until they became a free-flowing powder. The composition of the dried samples was determined using a variety of characterization. The exchanged samples will be hereafter notated as **MeOH-bMOF-200**. Anal. Calcd. (%): C, 27.02; H, 3.33; N, 18.91; Zn, 19.62; Cu, 9.53. Found: C, 26.27; H, 1.56; N, 18.72; Zn, 19.30; Cu, 8.71. Molecular Formula:  $Zn_2Cu(4-pyz)_2(ad)(MeOH) \cdot (MeOH),(H_2O)_3$ . Chemical Formula:  $C_{15}H_{22}N_9O_9Zn_2Cu$  FT-IR (4000-450cm<sup>-1</sup>): 3304 (br), 2982 (w), 2829 (w), 1677 (m), 1620 (w), 1554 (m), 1539 (m), 1283 (s), 1216 (m), 1047 (m), 1025 (m), 1007 (s), 895 (w), 819 (m), 798 (s).

**Determination of Composition.** After conducting solvent exchange procedures of **as-synthesized bMOF-200** with MeOH, the molecular formula of **MeOH-bMOF-200** was determined to be  $Zn_2Cu(4-pyz)_2(ad)(MeOH) \cdot (MeOH),(H_2O)_3$  by elemental analysis. <sup>1</sup>H-NMR of **MeOH-bMOF-200** showed complete removal of DMF without any loss of organic ligands 4-pyz and ad (**Figure S6**). The presence of two MeOH molecules and several water molecules were also observed. TGA analysis revealed an approximate loss 11% by mass by 230°C which correspond to three water molecules and one MeOH (calculated 12.9%) (**Figure S7**). The loss of the final MeOH molecule occurs at the small step between 230–280°C and accounts for an additional mass loss of ~5% (calculated 4.8%). We attribute this step to the loss of coordinated methanol, the displacement of which requires temperatures above the normal boiling point at atmospheric pressure. A

coordinated MeOH is indeed resolved in the single crystal structure of the methanol-exchanged crystal (see page S54). FT-IR spectroscopy was used to monitor the solvent exchange in bMOF-200 (**Figure S8**). The signals at 3304 (O–H stretch), 2829 (CH<sub>3</sub> stretch), 1385 (C–H in-plane rocking) and 1025 cm<sup>-1</sup> (C–O stretch) correspond to the presence of MeOH and only appear in the **MeOH-bMOF-200** spectrum. Meanwhile, the signals at 2925 (CH<sub>3</sub> stretch), 1646 (carbonyl stretch), and 1092 (C–O stretch) cm<sup>-1</sup> indicate the presence of DMF are only present in the **as-synthesized bMOF-200** spectrum, consistent with complete exchange of DMF with MeOH. PXRD confirmed the phase purity of **MeOH-bMOF-200** (**Figure S9**).

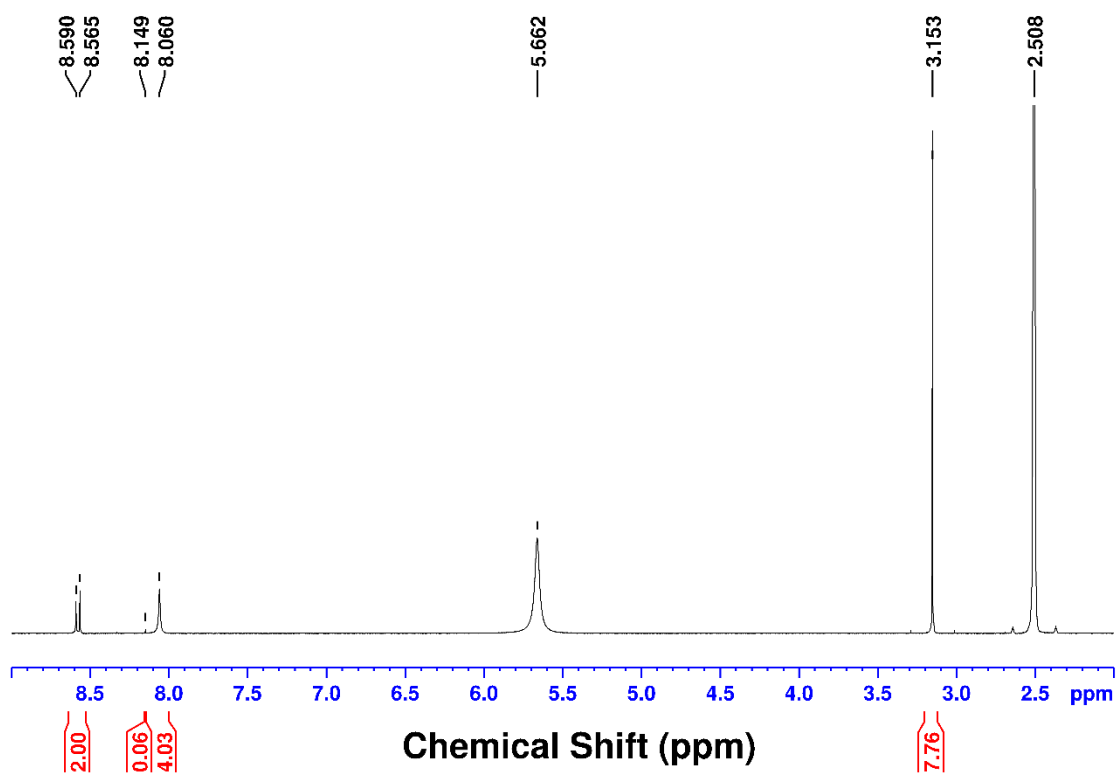

**Figure S6.** NMR spectrum of **MeOH-bMOF-200**. The disappearance of peaks at 7.95, 2.89, and 2.73 ppm and the emergence of a peak at 3.15 ppm correspond to complete replacement of DMF with MeOH. The integration shows approximately two molecules of MeOH for each adenine.



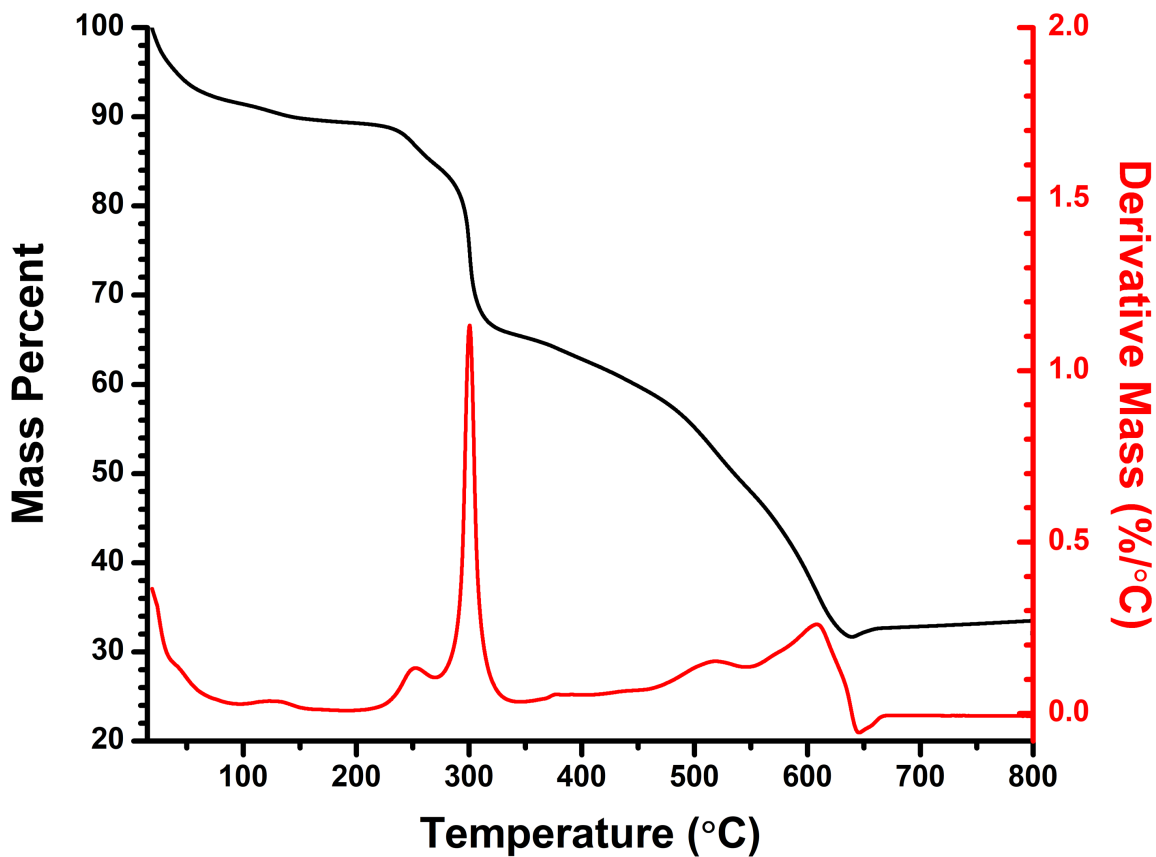

**Figure S7.** TGA of **MeOH-bMOF-200**. ~11% weight loss by 230 °C is attributed to uncoordinated MeOH and H<sub>2</sub>O. Further loss of an additional 5% between 230°C and 287°C is attributed to the loss of coordinated MeOH. Further mass loss beyond 300°C is attributed to decomposition, consistent with the TGA collected on the as-synthesized MOF.

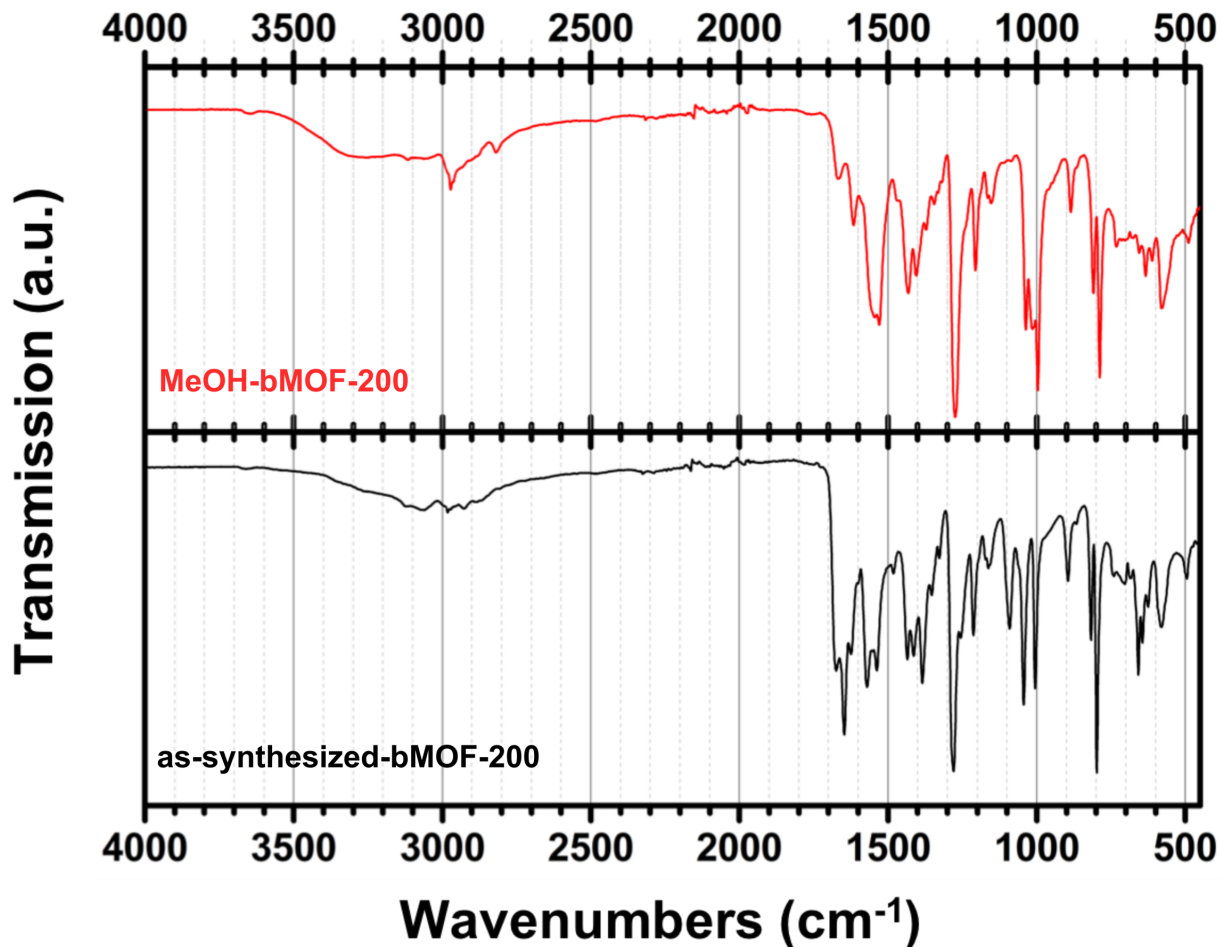

**Figure S8.** FT-IR spectra of **MeOH-bMOF-200** (red) and **as-synthesized bMOF-200** (black). The signals at 3304 (O–H stretch), 2829 (CH<sub>3</sub> stretch), 1385 (C–H in-plane rocking) and 1025 (C–O stretch) cm<sup>-1</sup> correspond to the presence of MeOH while the peaks at 2925 (CH<sub>3</sub> stretch), 1646 (carbonyl stretch), and 1092 (C–O stretch) cm<sup>-1</sup> indicate the presence of DMF.

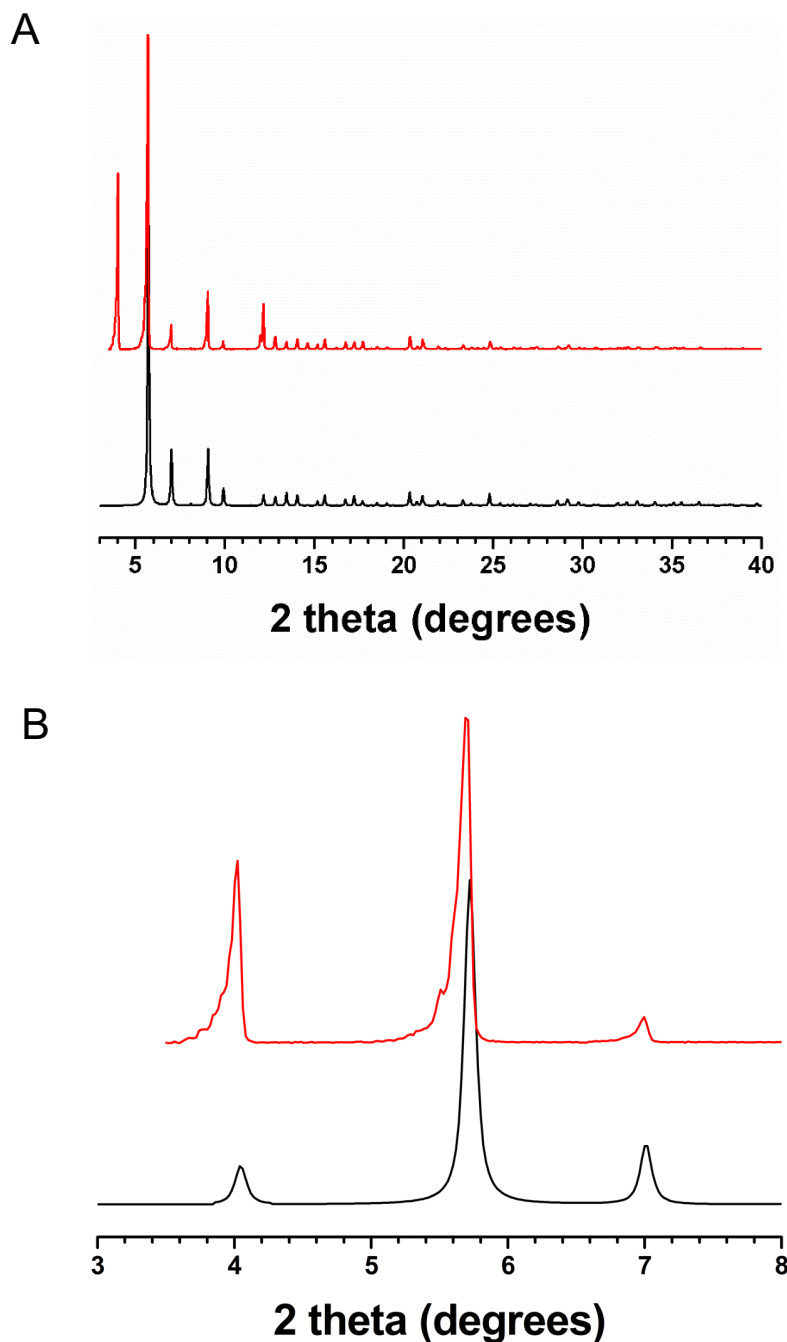

**Figure S9.** PXRD pattern of simulated (black) and **MeOH-bMOF-200** (red) (**A**). A peak at 4  $2\theta$  degrees becomes much more pronounced after solvent exchange with MeOH and matches a peak at the same position in the simulated PXRD pattern (**B**). The range between 3.8 and 4.2  $2\theta$  degrees in the simulated pattern in **Figure S9B** is multiplied by 100 to make this peak more apparent. This peak corresponds to the (200), which bisects the crystal along any of the equivalent faces and in which the coordinated DMF lies. The increase in intensity may result from replacing the coordinated DMF with MeOH.

### 2.3. Synthesis of **bMOF-201**

Unlike bMOF-200, **bMOF-201** syntheses did not require the use of evacuated tubes to obtain a pure product. In a typical reaction, 0.125 mmol (16.89 mg) adenine and 0.2 mmol (22.41 mg) H<sub>2</sub>-pyz were added to a 20 mL scintillation vial followed by the addition of 0.02 mmol (0.4 mL) of 70% HBF<sub>4</sub>. Then 4 mL of DMF were added to the mixture and the contents were dissolved using ultrasonication. Finally, 0.4 mmol (87.8 mg) of zinc acetate hexahydrate was added to the ligand solution. The resulting mixture was then sonicated again until all solids were dissolved. The vial was then capped with a PTFE lined cap and placed in a 120 °C oven for 16 hours. After removal from the oven, the resulting colourless cubic crystals were washed three times with 10 mL of fresh DMF. Solvent exchange with MeOH was performed on the DMF washed crystals by exchanging with dry MeOH (10mL) three times a day for three days. The crystals were then allowed to dry in air overnight and the resulting material was used for all characterization and analyses. Anal. Calcd. (%): C, 22.40; H, 4.00; N, 16.28; Zn, 24.48. Found: C, 22.72; H, 2.65; N, 16.26; Zn, 23.30. Molecular Formula: Zn<sub>2.9</sub>(pyz)<sub>2</sub>(Adenine)(HCOO<sup>-</sup>)<sub>0.45</sub>(CH<sub>3</sub>COO<sup>-</sup>)<sub>0.35</sub> • (MeOH)<sub>0.3</sub>, (H<sub>2</sub>O)<sub>10</sub>. Chemical Formula: C<sub>14.45</sub>H<sub>30.7</sub>N<sub>9</sub>O<sub>15.9</sub>Zn<sub>2.9</sub>.

**Determination of Composition:** The composition of **bMOF-201** was determined by EA and yielded a molecular formula of Zn<sub>2.9</sub>(pyz)<sub>2</sub>(Adenine)(HCOO<sup>-</sup>)<sub>0.45</sub>(CH<sub>3</sub>COO<sup>-</sup>)<sub>0.35</sub> • (MeOH)<sub>0.3</sub>, (H<sub>2</sub>O)<sub>10</sub>. The <sup>1</sup>H-NMR spectra of **bMOF-201** revealed the expected pyz : adenine ratio of 2 : 1, as well as the presence of acetate, formate, and MeOH and water molecules (**Figure S10**). The monocarboxylate species acetate and formate are generated *in situ* during the solvothermal synthesis from the dissolution of Zn(COOCH<sub>3</sub>)<sub>2</sub>

and the decomposition of DMF, respectively. These species coordinate to the Zn at the Zn-ad motifs. The resultant Zn content of 2.9 in the molecular formula was determined based on the amount of charge balancing species determined by NMR and the Zn amount determined from the ICP elemental analysis results. We note that a Zn content of 3 was expected for the molecular formula, but there may be some missing Zn defects that account for the observed slight discrepancy. TGA analysis of **bMOF-201** revealed an initial loss of ~11% below 150 °C that corresponds to the MeOH and a portion of the water molecules within the framework (**Figure S11**). The remaining water molecules are removed near at higher temperatures >290°C. We postulate that the removal of some solvent molecules via thermal heating requires elevated temperatures due to the blocking of P2 by coordinated monocarboxylates. A weight loss of ~5% at 200 °C is attributed to loss of coordinated formate and acetate (calculated 5.3%). Discrepancies between the elemental analysis, NMR, and TGA can be attributed to the hygroscopic nature of **bMOF-201**. The PXRD pattern matches very well to the simulated PXRD pattern generated from the single crystal structure, indicating phase purity (**Figure S12**).

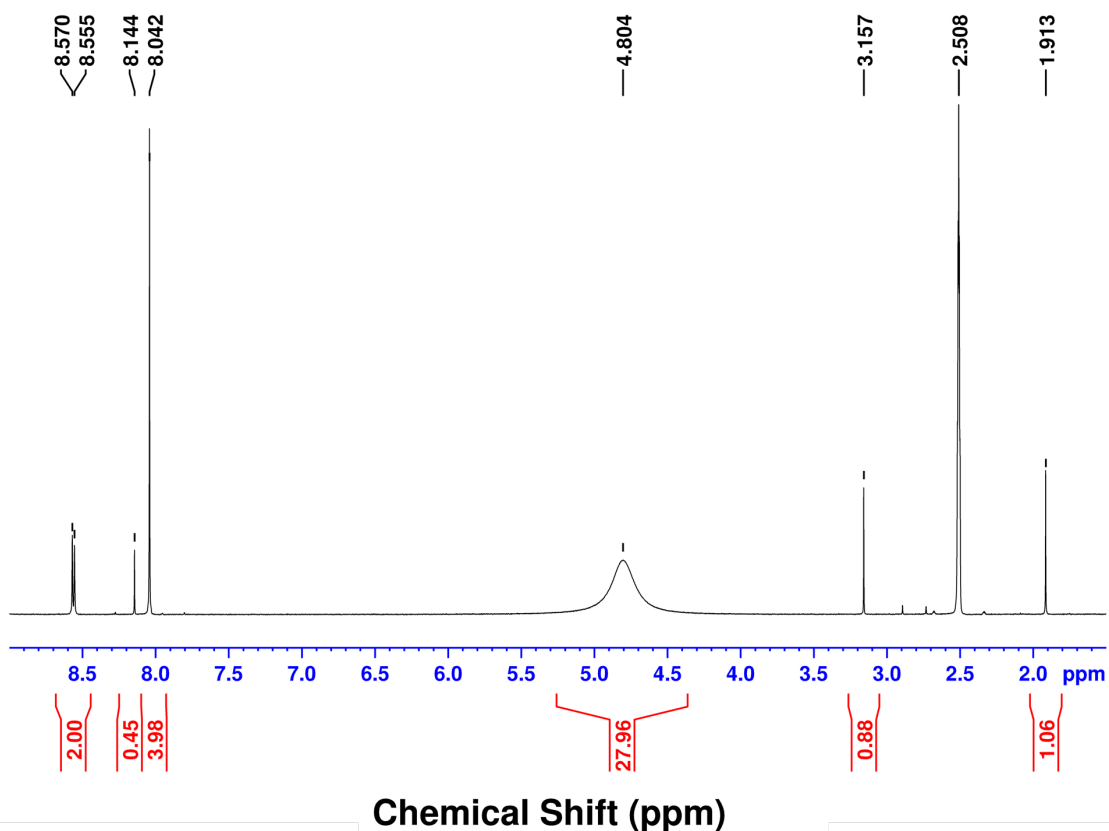

**Figure S10.** <sup>1</sup>H-NMR spectrum of **bMOF-201** after solvent exchange with MeOH and drying in air overnight. The signals due to adenine are at 8.57 ppm. The signal at 8.042 ppm corresponds to H<sub>2</sub>-pyz protons. Charge-balancing coordinated ions formate and acetate are located at 8.14 ppm and 1.913 ppm, respectively. The signal at 3.15 ppm corresponds to MeOH. The integration shows approximately 0.45 formate, 0.35 acetate, and 0.3 MeOH molecules per adenine molecule.

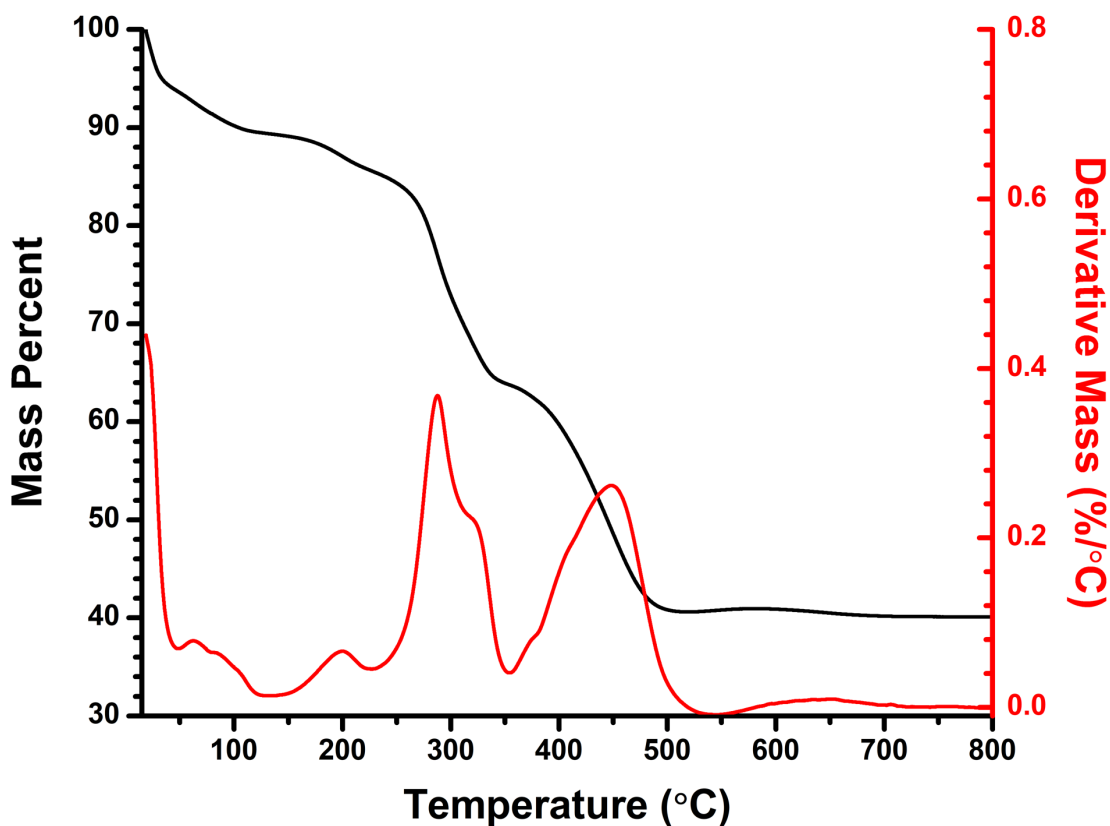

**Figure S11.** TGA of **bMOF-201**. The black curve shows the recorded weight loss with increasing temperature and the red curve is the first derivative weight loss with respect to temperature. The loss of a portion of the uncoordinated water molecules (~11%) and MeOH occurs before 100°C. The weight loss between 200°C and 250°C is attributed to the removal of coordinated monocarboxylates formate or acetate, which is approximately 5% of the total mass. Subsequent weight losses are attributed to framework decomposition and release of any trapped solvent.

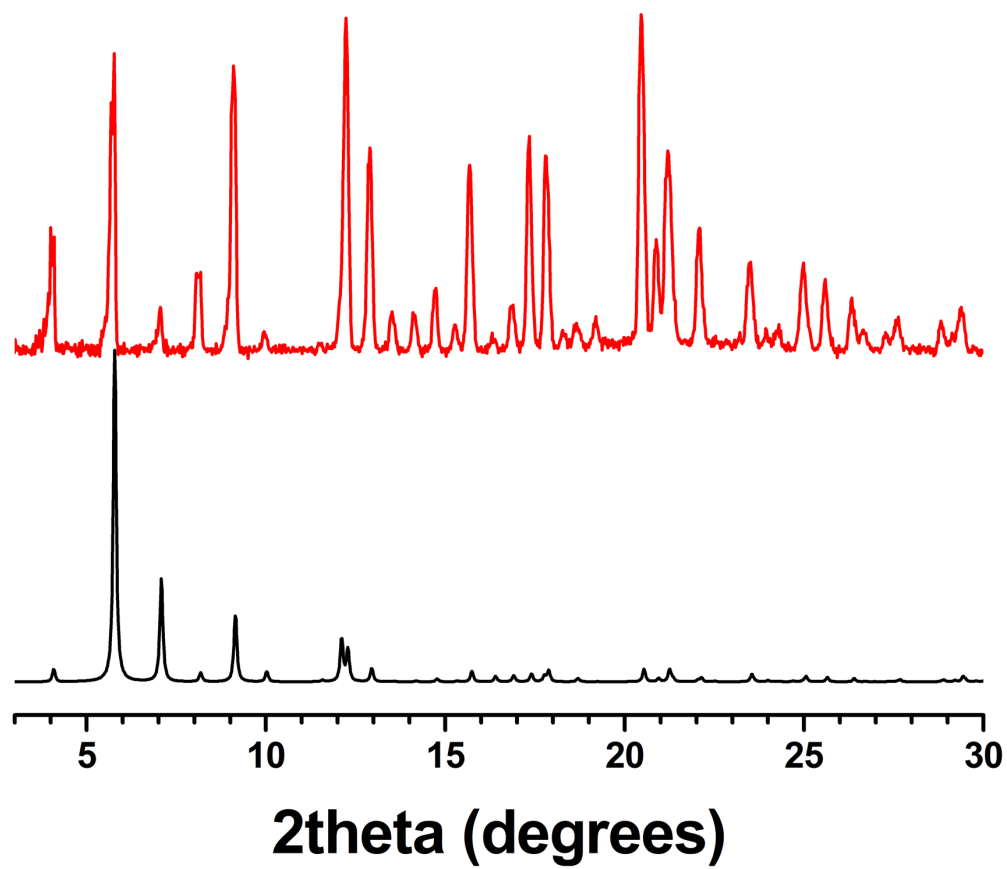

**Figure S12.** PXRD patterns of simulated (black) and synthesized **bMOF-201** (red). Simulated pattern was calculated from SC-XRD data.



### 3. Gas adsorption studies

#### 3.1 Activation of **MeOH-bMOF-200**

**MeOH-bMOF-200** was activated on a Micromeritics SmartVacPrep instrument. Approximately 50 mg of sample was added to a pre-weighed sample tube, which was installed onto an instrument port. The sample was then heated at 60°C for 1 hour, 100°C for 2 hours, then finally at 150°C for 24 hours under vacuum. For each temperature ramp, the rate was maintained at 10°C/min. After cooling back to room temperature, the sample was weighed again, then installed onto a Micromeritics 3-Flex gas adsorption analyzer.

#### 3.2 Gas adsorption isotherms

The N<sub>2</sub> gas adsorption isotherm was collected on a Micromeritics 3-flex gas adsorption analyzer. The sample was activated at 150°C under 1.0 mmHg on a Micromeritics SmartVacPrep for 24 hours. A liquid N<sub>2</sub> bath was used for the N<sub>2</sub> adsorption experiments at 77 K. A Quantachrome Autosorb-1 instrument was used to activate the sample used for CO<sub>2</sub> adsorption. The material was held at 150°C under 1.0 mmHg for 24 hours. The CO<sub>2</sub> adsorption isotherm was collected on the same instrument using a dry ice/acetone bath at 195 K.

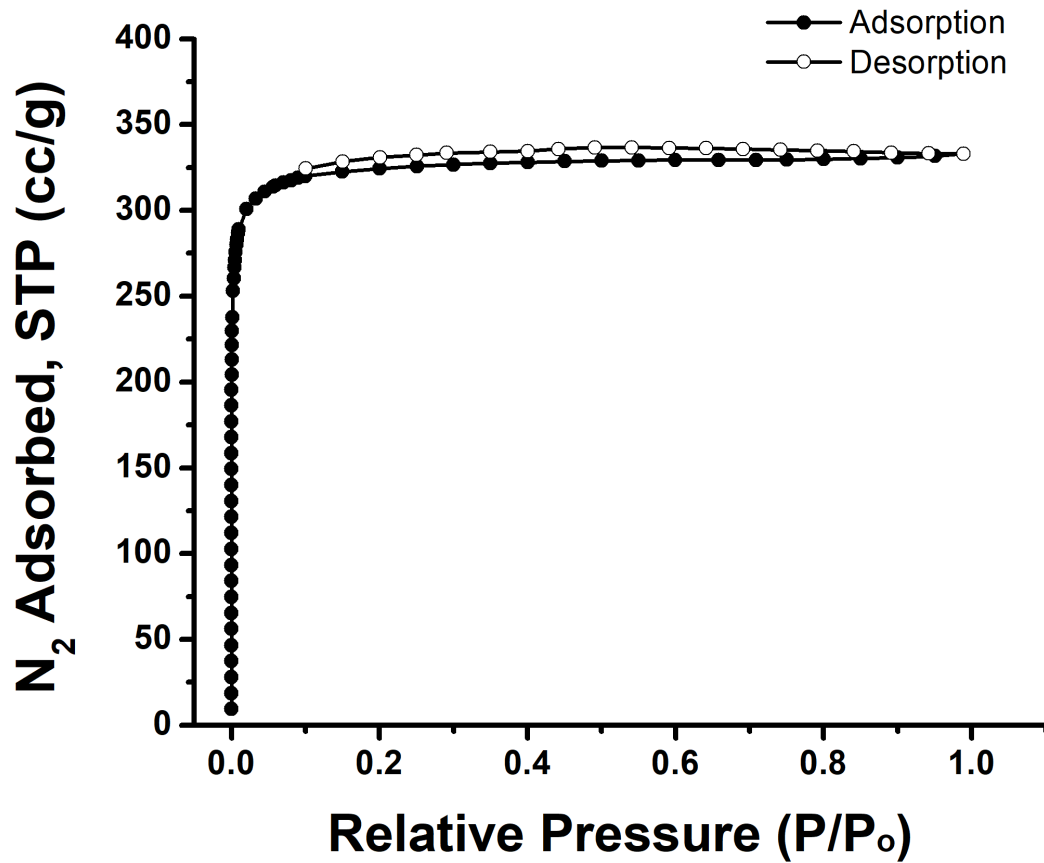

**Figure S13.** N<sub>2</sub> adsorption isotherm of **MeOH-bMOF-200** at 77 K after activation at 150°C under vacuum for 24 hrs. The calculated BET surface area was 1317 m<sup>2</sup>g<sup>-1</sup>.

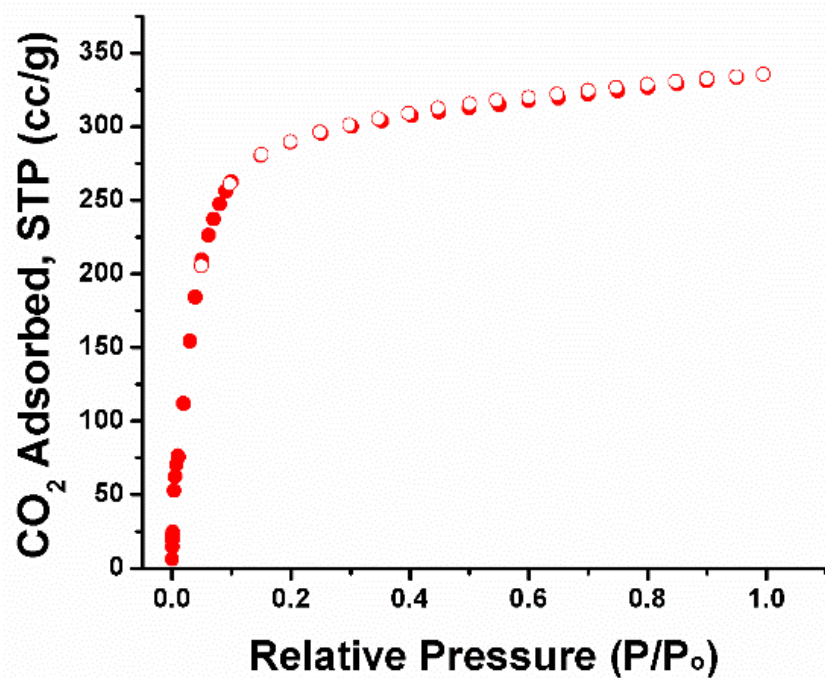

**Figure S14.** CO<sub>2</sub> adsorption isotherm of **MeOH-bMOF-200** collected at 195 K. The calculated BET surface area was 1741 m<sup>2</sup>g<sup>-1</sup>.

## 4. Computational methods

### 4.1 Computational Methodology

Density Functional Theory (DFT) calculations were used to examine physisorption of H<sub>2</sub> and CO<sub>2</sub> inside the MOF and the diffusion barrier of H<sub>2</sub> and CO<sub>2</sub> through the two distinctive openings on the Zn-pyrazolate cage. The structure of the MOF was obtained through SC-XRD. The base unit cell contains a total of 2448 atoms, which is computationally demanding, if not infeasible. Thus, we have generated a reduced unit cell with 888 atoms, by replacing some of the adenine ligands with their mirrored images. We believe this necessary simplification is valid, because one would expect stereochemistry at the substituted locations to play a minimum role in the adsorption and diffusion of linear molecules. In each physisorption calculation, we have placed one guest molecule inside the MOF and the entire structure was optimized with no geometric constraints. We have tested 15 unique initial placements in each set of H<sub>2</sub> and CO<sub>2</sub> physisorption calculations. The shortest distance between the adsorbate and the MOF at the optimized structure is reported in **Table S1**. The positioning of the CO<sub>2</sub> with the largest binding energy with bMOF-200 is shown in **Figure S15**.

**Table S1.** Physisorption energies and bond distances for either CO<sub>2</sub> or H<sub>2</sub> in the periodic **bMOF-200** in the reduced unit cell.

| CO <sub>2</sub>           |                 |                              | H <sub>2</sub>            |                 |                             |
|---------------------------|-----------------|------------------------------|---------------------------|-----------------|-----------------------------|
| Physisorption energy (eV) | Bond length (Å) | Atoms (MOF-CO <sub>2</sub> ) | Physisorption energy (eV) | Bond length (Å) | Atoms (MOF-H <sub>2</sub> ) |
| -0.158                    | 3.1762          | Cu-O                         | -0.180                    | 2.7587          | Cu-H                        |
| -0.141                    | 3.0727          | Cu-O                         | -0.284                    | 2.4542          | H-H                         |
| -0.267                    | 2.7073          | H-O                          | -0.159                    | 2.7646          | Cu-H                        |
| -0.189                    | 2.7755          | H-O                          | -0.160                    | 2.5529          | H-H                         |
| -0.242                    | 3.0794          | C-O                          | -0.188                    | 2.7997          | O-H                         |
| -0.218                    | 2.4798          | H-O                          | -0.265                    | 2.4696          | H-H                         |
| -0.314                    | 2.4330          | H-O                          | -0.114                    | 2.8810          | N-H                         |
| -0.153                    | 3.0904          | C-C                          | -0.162                    | 2.4993          | O-H                         |
| -0.233                    | 2.5631          | H-O                          | -0.171                    | 2.5761          | H-H                         |
| -0.237                    | 2.8552          | H-O                          | -0.169                    | 2.4880          | O-H                         |
| -0.219                    | 2.6039          | H-O                          | -0.251                    | 2.4898          | H-H                         |
| -0.258                    | 3.0871          | O-C                          | -0.176                    | 2.7841          | O-H                         |
| -0.199                    | 2.6361          | H-O                          | -0.160                    | 2.4887          | O-H                         |
| -0.249                    | 3.1634          | Zn-O                         | -0.186                    | 2.8867          | Zn-H                        |
| -0.249                    | 2.7536          | H-O                          | -0.160                    | 2.4893          | O-H                         |

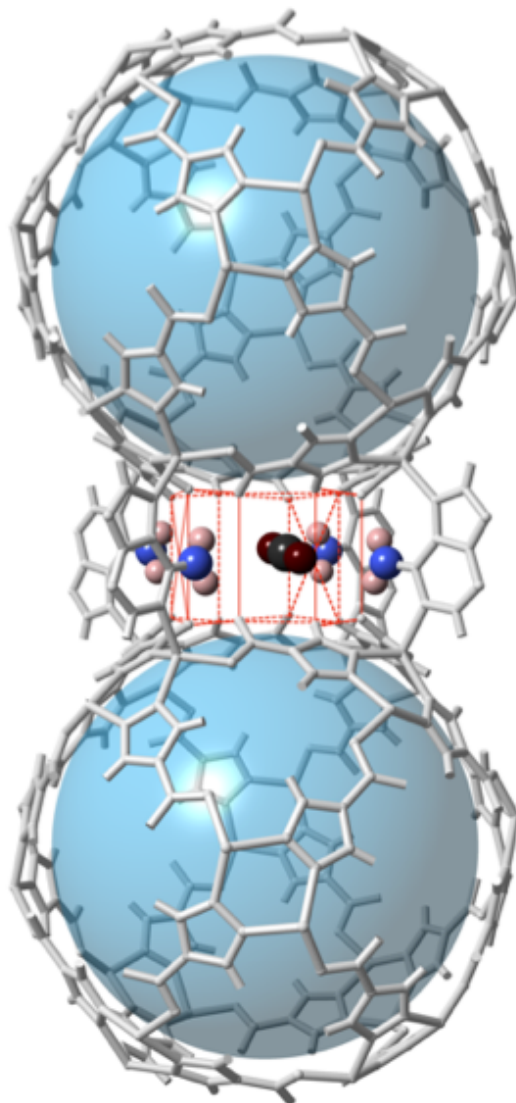

**Figure S15.** Periodic model of **bMOF-200** showing the position of  $\text{CO}_2$  in P3, where it has its strongest binding energy as calculated from DFT. Primary amines are highlighted to emphasize their proximity to the adsorbed  $\text{CO}_2$  molecule. Black, maroon, blue, and pink spheres indicate C, O, N, and H atoms, respectively. Red dashed lines highlight the pore boundaries of P3.

While the physisorption calculations were performed using the reduced unit cell, the diffusion barriers were predicted using a freestanding Zn-pyrazolate cage model. We have isolated the Zn-pyrazolate cage by terminating the dangling adeninate bonds with hydrogen atoms. This isolated cage retains both the square and triangular openings as

the cage inside the MOF. The difference in the neighboring H–H distance in the triangular and square opening is roughly 0.05 Å, and 0.1 Å, respectively, between the isolated cage and the periodic MOF at the optimized structures. We have calculated the minimum energy path for H<sub>2</sub> and CO<sub>2</sub> to travel from the center of the isolated cage to a point far (~6 Å) away from the cage through crossing each type of aperture. The reported distance in **Figure 3** is the distance between the center of mass of the adsorbate and the imaginary plane at the aperture along the optimized diffusion path. The plane for the triangular opening is defined by the positions of the hydrogen atoms. The plane for the square opening is defined by the vectors of the dihedral hydrogen atoms and their center of mass.

#### 4.2 Density Functional Theory (DFT) Details

The DFT calculations performed here are done using the CP2K code.<sup>2</sup> The PBE functional was used to describe the exchange-correlations effects, and Grimme's D3 dispersion correction was included in order to describe van der Waals interactions inside the MOF.<sup>3,4</sup> Atomic species were described using the DZVP-MOLOPT basis set in combination with Geodecker, Teter and Hutter pseudopotentials, with a planewave cutoff of 360 Ry and relative cutoff of 60 Ry.<sup>5</sup> For the periodic system, the reduced unit cell has fixed angles of  $\alpha = \beta = \gamma = 60^\circ$ , and the optimized unit cell length is 31.061 Å, which is in close agreements with the experimental value of 30.864 Å. The freestanding calculations were performed in a periodic  $30 \times 30 \times 30 \text{ \AA}^3$  cubic cell. The diffusion barrier of H<sub>2</sub> and CO<sub>2</sub> through the square and triangular openings on the freestanding Zn-pyrazolate cage was investigated using nudged elastic band method implemented in CP2K, and the force acting on any atom is below 0.077 eV/Å at the optimized geometry.<sup>6,7</sup> The DFT functional

used in this study has a mean absolute deviation (MAD) of 0.076 eV when benchmarked against the data set (S22x5) for interaction energies of noncovalently bonded complexes.<sup>8,9</sup> We believe the uncertainty in our calculated physisorption energy and diffusion barrier is similar in magnitude as the reported MAD. We do not expect systematic DFT errors, such as self-interaction, to be prominent for the weakly bound adsorbates investigated.<sup>10</sup>

## 5. Gas Breakthrough experiments

### 5.1 Breakthrough experiments

Breakthrough experiments were used to investigate the separation of H<sub>2</sub> and CO<sub>2</sub> by **bMOF-200**, **HKUST-1**, **ZIF-8**, and **UiO-66**. **HKUST-1**, **ZIF-8**, and **UiO-66** were solvent-exchanged and dried following gas adsorption activation procedures reported in the literature for these materials (see section 5.2 below). **bMOF-200** was solvent exchanged with MeOH, according to the preparation for gas adsorption studies and air dried prior to loading in the column (see Sections 2.2 and 3.1). MOF crystals were packed in a column with a diameter of 5 mm and a length of 50 mm and supported by quartz wool plugs on both ends of a quartz tube. Prior to the measurements the MOF-loaded column was activated *in situ* by continuous helium flow (20 sccm) at 150 °C (at 300°C for ZIF-8) with a ramp rate of 5 K/min for 12 hours. After activation, the column was cooled down to room temperature in helium flow. A mixture of 80 vol% H<sub>2</sub> and 20 vol % CO<sub>2</sub> was introduced to the column with a total flow rate of 5 sccm. The effluent gas was detected by mass spectrometry with a detection limit of 0.0008%. Any overshoot of H<sub>2</sub> above C/C<sub>0</sub> = 1.0 in



the breakthrough experiments can be explained by the displacement of adsorbed H<sub>2</sub> by CO<sub>2</sub> via competitive adsorption.

## 5.2 Synthesis and characterization of reference MOFs

### **Synthesis of UiO-66**

UiO-66 was synthesized following a literature procedure.<sup>11</sup> A ratio of H<sub>2</sub>-BDC:Zr of 2:1 was used and the synthesis was performed at 200°C.

### **Synthesis of HKUST-1**

HKUST-1 was synthesized following a literature procedure.<sup>12</sup>

### **Synthesis of ZIF-8**

ZIF-8 was synthesized following a literature procedure.<sup>13</sup>

PXRD patterns were collected and compared to simulated patterns generated from the reported single crystal data in each respective reference (**Figure S16**). Gas adsorption isotherms for reference MOFs were collected on a Micromeritics 3-flex gas adsorption analyzer. All samples were activated under conditions specified in the cited literature on a Micromeritics SmartVacPrep under vacuum and heat. For all cases, approximately 50 mg of washed and/or solvent exchanged sample was added into a pre-weighed sample analysis tube. A liquid N<sub>2</sub> bath was used for N<sub>2</sub> adsorption experiments at 77 K. The BET surface areas for these synthesized MOFs are comparable to reported values (**Table S2**).

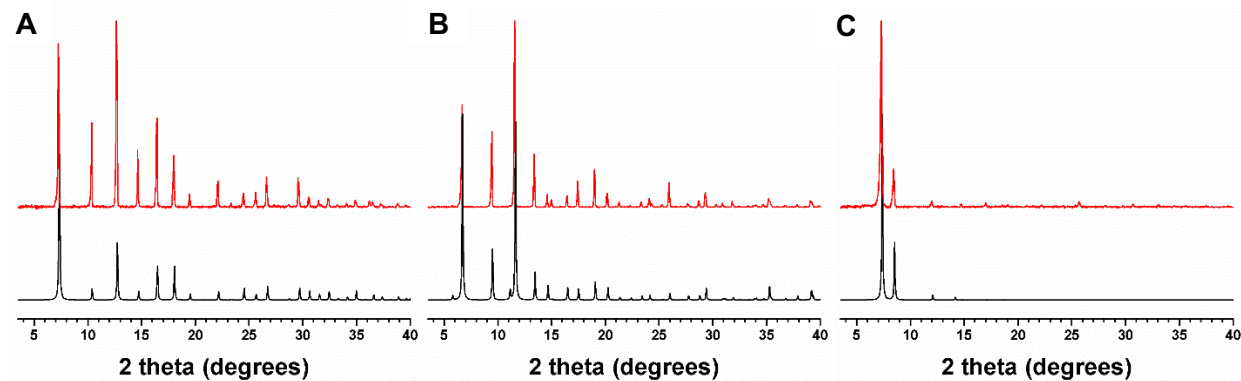

**Figure S16.** Experimental (red) and simulated PXRD patterns (black) of **HKUST-1** (A), **ZIF-8** (B), and **UiO-66** (C).

**Table S2.** Experimental BET surface area values for **HKUST-1**, **ZIF-8**, and **UiO-66** used in breakthrough experiments with corresponding literature values.

| MOF     | Experimental BET SA<br>( $\text{m}^2\text{g}^{-1}$ ) | Reported BET SA<br>( $\text{m}^2\text{g}^{-1}$ ) |
|---------|------------------------------------------------------|--------------------------------------------------|
| HKUST-1 | 1419                                                 | 1387                                             |
| ZIF-8   | 1598                                                 | 1630                                             |
| UIO-66  | 1125                                                 | 1212                                             |

## 6. Membrane fabrication and gas separation studies

### 6.1 Fabrication of **bMOF-200** Membranes

**bMOF-200** membranes were synthesized on a homemade  $\alpha$ - $\text{Al}_2\text{O}_3$  disk substrate *via* the secondary growth method. A 0.5 wt % **bMOF-200** crystal suspension was prepared in methanol. This suspension was used for dip coating the  $\alpha$ - $\text{Al}_2\text{O}_3$  disk substrate, using a 30 s contact time. The seeded substrates were then placed horizontally in a glass reaction vessel and solvothermally treated with **bMOF-200** reaction components to form a **bMOF-200** layer. The molar composition of precursor solution for membrane synthesis was identical to that of **bMOF-200** crystal synthesis precursor solution. Repeated solvothermal growth up to five coats was employed in this study in order to form well-intergrown membrane. The as-synthesized membrane was washed repeatedly with dry DMF (3X) and immersed in dry methanol for two days for solvent exchange. Three membranes were synthesized under identical condition in order to verify reproducibility.

### 6.2 Fabrication of **bMOF-201** Membranes

A suspension of 0.5 wt % **bMOF-201** crystals was prepared in dry methanol for generating a seed layer on a homemade  $\alpha$ - $\text{Al}_2\text{O}_3$  disk substrate. The seeded substrates prepared by dip coating method were immersed in precursor solution for **bMOF-201**. The molar composition of precursor solution was identical that used for **bMOF-201** crystal synthesis except for the amount of added  $\text{HBF}_4$ . To avoid seed crystal dissolution from the substrate due to acidic condition, the amount of  $\text{HBF}_4$  was reduced by half. The reaction vessel was placed in a 120°C oil bath for 48 h. Repeated growth was not necessary for the **bMOF-201** membranes and well-intergrown membranes were successfully fabricated after

secondary growth. As-synthesized membranes were washed with dry DMF (3X) followed by solvent exchange with dry methanol. The solvent exchange procedure was identical to section 6.1. We confirmed the reproducibility by synthesizing three membranes under identical conditions from different batches.

### 6.3 Membrane Characterization

PXRD pattern of **bMOF-200** membranes (**Figure S17**) and **bMOF-201** membranes (**Figure S18**) showed a high degree of crystallinity with all matching peaks with powder XRD patterns of crystals. After repeated growth of **bMOF-200** membrane, the measured thickness was  $\sim 37.3 \pm 4.3 \mu\text{m}$ , as determined from a cross-sectional view of membrane (**Figures 5a and 5b**). Rapid nucleation of **bMOF-201** crystals facilitated formation of well-intergrown membranes after the secondary growth, resulting in thicker membrane with thickness of  $\sim 62.7 \pm 3.2 \mu\text{m}$  (**Figures 5c and 5d**). For both types of membranes, no visible cracks or defects were found on the surface. The  $\text{H}_2/\text{CO}_2$  separation performances of **bMOF-200** and **bMOF-201** membranes are summarized in **Table S1** and **Table S2**. The permeance of each membrane was measured for three consecutive days and both permeances and separation factor remained unchanged. The points for **bMOF-200** and **bMOF-201** reported in the Robeson plot (**Figure 7**) are the average values of the three different membranes listed in **Tables S1** and **Table S2**.

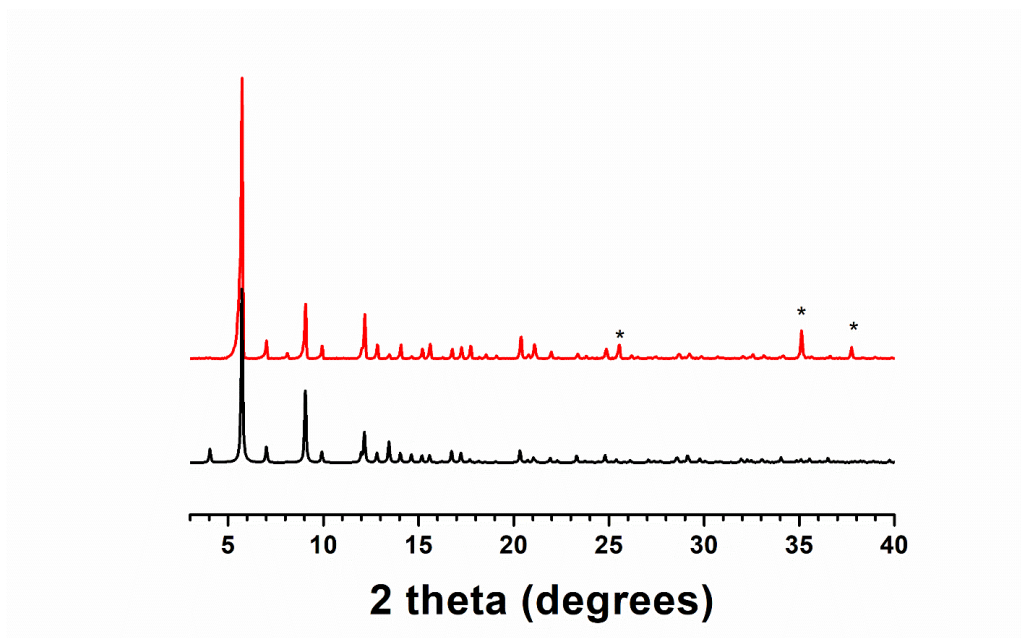

**Figure S17.** PXRD pattern of **as-synthesized bMOF-200** (black) and activated **bMOF-200** membrane prepared on  $\alpha$ -Al<sub>2</sub>O<sub>3</sub> substrate (red). Asterisks indicate  $\alpha$ -Al<sub>2</sub>O<sub>3</sub> diffraction lines.

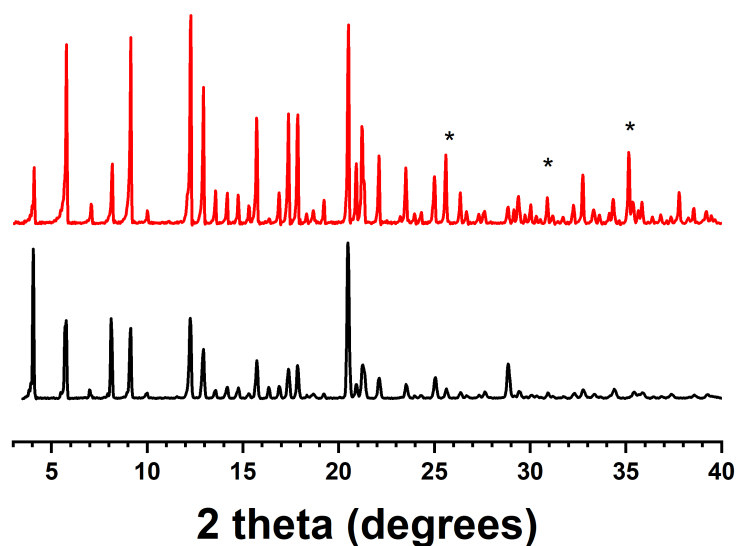

**Figure S18.** PXRD pattern of **bMOF-201** (black) and activated **bMOF-201** membrane prepared on  $\alpha$ -Al<sub>2</sub>O<sub>3</sub> substrate (red). Asterisks indicate  $\alpha$ -Al<sub>2</sub>O<sub>3</sub> diffraction lines.

## 6.4 Experimental Setup for Permeation Studies

After the solvent exchange, the membranes were activated at 423K for 24 hours in helium atmosphere before permeation measurement in order to remove any solvents molecules potentially remaining in the pore. For binary mixture permeation measurement, the membrane was sealed in a gas tight module with silicon o-rings. Membrane permeation behavior was investigated in Wicke-Kallenbach mode at a system pressure of 99 kPa for both feed and permeate side without pressure drop (**Scheme S1**). The feed containing a mixture of H<sub>2</sub> and CO<sub>2</sub> (50/50) was introduced to the membrane side with a total feed flow rate of 200 mL/min and the composition was adjusted using mass flow controller. The compositions of feed, permeate, and retentate were analyzed by a gas chromatograph (Agilent-GC8860). N<sub>2</sub> was introduced with volumetric flow rate of 50 mL/min to the permeate side as a sweep gas. The permeance of component *i* was calculated using the equation as follows

$$\bar{P}_i = \frac{J_i}{\Delta p_i}$$

where  $\bar{P}_i$  is permeance (mol/m<sup>2</sup>·s·Pa),  $J_i$  is steady-state flux (mol/m<sup>2</sup>·s), and  $\Delta p_i$  is transmembrane partial pressure drop. Permeability (mol·m/m<sup>2</sup>·s·Pa) was calculated as permeance multiplied by thickness of the membrane. The separation factor ( $\alpha_{i,j}$ ) is defined as

$$\alpha_{i,j} = \frac{y_i/y_j}{x_i/x_j}$$

where  $y_i$  and  $y_j$  are mol fractions in permeate side, and  $x_i$  and  $x_j$  are molar composition in feed side for component *i* and *j*, respectively.

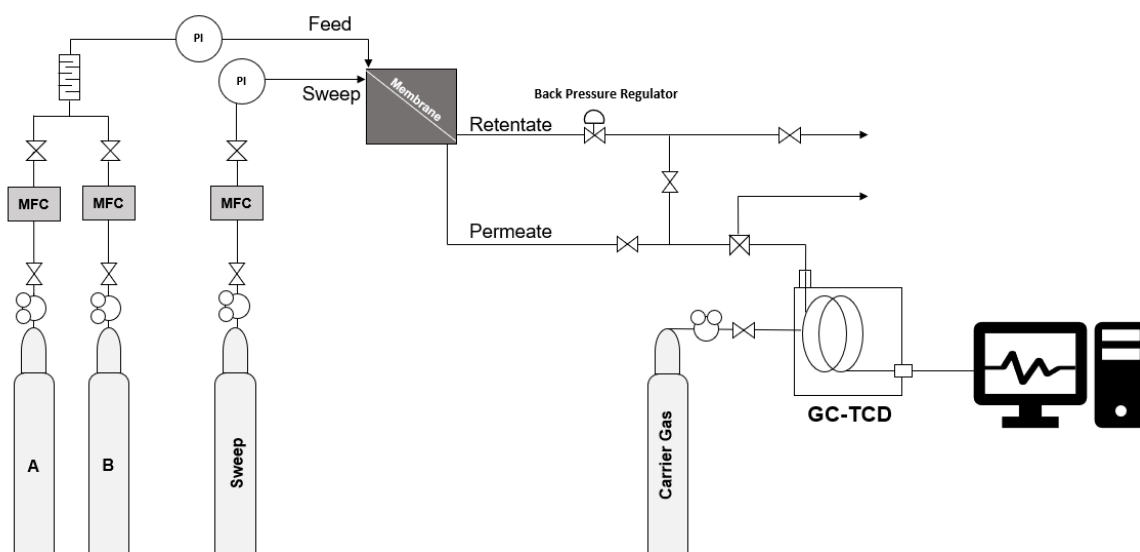

**Scheme S1.** Schematic diagram of binary mixture permeation system (A,B: target gas; MFC: mass flow controller; PI: pressure indicator).

**Table S3.** Separation performances of three **bMOF-200** membranes for the equimolar binary mixture of H<sub>2</sub>/CO<sub>2</sub> at 25°C and 1 bar. The first column lists the iteration of the tested membrane, where M1 was the first membrane tested.

|    | Thickness (μm) | Permeance (mol / m <sup>2</sup> · s · Pa) |                         | Permeability (mol · m / m <sup>2</sup> · s · Pa) |                          | Separation factor |
|----|----------------|-------------------------------------------|-------------------------|--------------------------------------------------|--------------------------|-------------------|
|    |                | H <sub>2</sub>                            | CO <sub>2</sub>         | H <sub>2</sub>                                   | CO <sub>2</sub>          |                   |
| M1 | 35.5           | 1.57 x 10 <sup>-6</sup>                   | 1.24 x 10 <sup>-7</sup> | 5.59 x 10 <sup>-11</sup>                         | 4.40 x 10 <sup>-12</sup> | 7.0               |
| M2 | 43.3           | 1.26 x 10 <sup>-6</sup>                   | 1.00 x 10 <sup>-7</sup> | 5.48 x 10 <sup>-11</sup>                         | 4.35 x 10 <sup>-12</sup> | 6.9               |
| M3 | 33.2           | 1.64 x 10 <sup>-6</sup>                   | 1.10 x 10 <sup>-7</sup> | 5.47 x 10 <sup>-11</sup>                         | 3.67 x 10 <sup>-12</sup> | 9.8               |

**Table S4.** Separation performances of three **bMOF-201** membranes for the equimolar binary mixture of H<sub>2</sub>/CO<sub>2</sub> at 25°C and 1 bar. The first column lists the iteration of the tested membrane, where M4 was the first membrane tested.

|    | Thickness (μm) | Permeance (mol / m <sup>2</sup> · s · Pa) |                         | Permeability (mol · m / m <sup>2</sup> · s · Pa) |                          | Separation factor |
|----|----------------|-------------------------------------------|-------------------------|--------------------------------------------------|--------------------------|-------------------|
|    |                | H <sub>2</sub>                            | CO <sub>2</sub>         | H <sub>2</sub>                                   | CO <sub>2</sub>          |                   |
| M4 | 67.0           | 6.14 x 10 <sup>-7</sup>                   | 2.17 x 10 <sup>-8</sup> | 4.11 x 10 <sup>-11</sup>                         | 1.45 x 10 <sup>-12</sup> | 22.2              |
| M5 | 59.5           | 6.55 x 10 <sup>-7</sup>                   | 2.28 x 10 <sup>-8</sup> | 3.90 x 10 <sup>-11</sup>                         | 1.36 x 10 <sup>-12</sup> | 20.0              |
| M6 | 61.5           | 6.19 x 10 <sup>-7</sup>                   | 1.94 x 10 <sup>-8</sup> | 3.81 x 10 <sup>-11</sup>                         | 1.19 x 10 <sup>-12</sup> | 24.4              |



## 7. Single Crystal X-Ray Diffraction and Crystallographic Tables

### 7.1 As-synthesized-bMOF-200

Single crystal X-ray diffraction data for bMOF-200 was collected on a Bruker X8 Prospector Ultra diffractometer equipped with an Apex II CCD detector and an I $\mu$ S micro-focus CuK- $\alpha$  X-ray source ( $\lambda = 1.54178 \text{ \AA}$ ). A purple cubic crystal of dimensions  $0.07 \times 0.07 \times 0.07 \text{ mm}^3$  was mounted on a goniometer using MiTeGen MicroMesh tips. Data was collected under N<sub>2</sub> stream at 230 K and processed using the Bruker APEX II software package.

A cubic unit cell with dimensions  $a = b = c = 43.6231(6) \text{ \AA}$ ,  $\alpha = \beta = \gamma = 90^\circ$ , was derived from least squares refinement of 59240 reflections in range of  $4.048^\circ < 2\theta < 107.766^\circ$ . Centrosymmetric space group  $Fm\bar{3}c$  was determined based on intensity statistics and systematic absences. The data were collected and integrated to  $0.89 \text{ \AA}$  by Bruker program SAINT.<sup>14</sup> Empirical absorption correction was applied using program SADABS.<sup>14</sup> The structure was solved with direct method using SHELXT and refined by full-matrix least-squares on  $F^2$  using SHELXL in Olex2.<sup>15-17</sup> All the non-H atoms were refined anisotropically. All the H atoms were refined isotropically. Crystallographic data are summarized in **Tables S5-S10**.

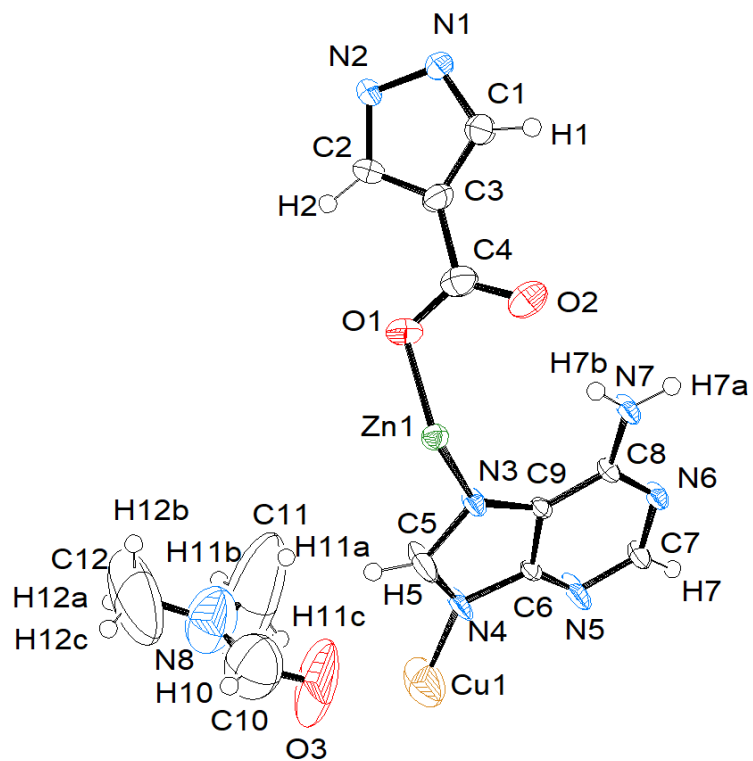

**Figure S19.** Asymmetric unit of **as-synthesized bMOF-200** with all non-H atoms represented by thermal ellipsoids drawn at 50% probability level produced by ORTEP-3<sup>18</sup> (O, red; C, black; N, blue; Zn, green; Cu, gold; H, black spheres).

**Table S5.** Crystallographic data and structural refinement for **as-synthesized bMOF-200**.

|                                                |                                                                  |
|------------------------------------------------|------------------------------------------------------------------|
| Identification code                            | <b>as-synthesized bMOF-200</b>                                   |
| Empirical formula                              | $C_{15.5}H_{15}CuN_{10}O_5Zn_2$                                  |
| Formula weight                                 | 615.65                                                           |
| Temperature/K                                  | 230.01                                                           |
| Crystal system                                 | cubic                                                            |
| Space group                                    | Fm-3c                                                            |
| a/Å                                            | 43.6231(6)                                                       |
| b/Å                                            | 43.6231(6)                                                       |
| c/Å                                            | 43.6231(6)                                                       |
| $\alpha/^\circ$                                | 90                                                               |
| $\beta/^\circ$                                 | 90                                                               |
| $\gamma/^\circ$                                | 90                                                               |
| Volume/Å <sup>3</sup>                          | 83014(3)                                                         |
| Z                                              | 96                                                               |
| $\rho_{\text{calc}}/\text{cm}^3$               | 1.182                                                            |
| $\mu/\text{mm}^{-1}$                           | 2.625                                                            |
| F(000)                                         | 29472.0                                                          |
| Crystal size/mm <sup>3</sup>                   | 0.07 × 0.07 × 0.07                                               |
| Radiation                                      | CuK $\alpha$ ( $\lambda = 1.54178$ )                             |
| 2 $\theta$ range for data collection/ $^\circ$ | 4.05 to 110.852                                                  |
| Index ranges                                   | -33 ≤ h ≤ 45, -45 ≤ k ≤ 44, -44 ≤ l ≤ 42                         |
| Reflections collected                          | 56571                                                            |
| Independent reflections                        | 2312 [ $R_{\text{int}} = 0.0804$ , $R_{\text{sigma}} = 0.0276$ ] |
| Data/restraints/parameters                     | 2312/78/188                                                      |
| Goodness-of-fit on $F^2$                       | 1.131                                                            |
| Final R indexes [ $l > 2\sigma(l)$ ]           | $R_1 = 0.0674$ , $wR_2 = 0.2129$                                 |
| Final R indexes [all data]                     | $R_1 = 0.0746$ , $wR_2 = 0.2185$                                 |
| Largest diff. peak/hole / e Å <sup>-3</sup>    | 2.89/-1.30                                                       |

**Table S6.** Fractional atomic coordinates ( $\times 10^4$ ) and equivalent isotropic displacement parameters ( $\text{\AA}^2 \times 10^3$ ) for **as-synthesized bMOF-200**.  $U_{\text{eq}}$  is defined as 1/3 of the trace of the orthogonalized  $U_{ij}$  tensor.

| Atom | <i>x</i>   | <i>y</i>   | <i>z</i>   | $U(\text{eq})$ |
|------|------------|------------|------------|----------------|
| Zn1  | 2800.0(2)  | 4202.1(2)  | 3790.7(2)  | 20.7(4)        |
| Cu1  | 2881.5(6)  | 4670.1(4)  | 5000       | 73.4(8)        |
| O1   | 3167.5(11) | 4151.1(12) | 3545.0(11) | 40.7(13)       |
| N1   | 3657.6(12) | 4201.7(12) | 2634.8(12) | 25.7(13)       |
| N2   | 3818.3(12) | 4045.6(13) | 2853.5(12) | 25.6(13)       |
| O2   | 2933.1(12) | 4470.9(13) | 3231.8(13) | 51.5(15)       |
| C3   | 3393.1(15) | 4230.7(15) | 3066.8(16) | 29.1(16)       |
| C2   | 3654.0(16) | 4062.8(16) | 3111.7(16) | 32.3(17)       |
| C1   | 3402.1(15) | 4310.4(16) | 2762.8(15) | 30.5(16)       |
| N4   | 2893(3)    | 4692(2)    | 4613.9(14) | 36(3)          |
| C5   | 2882(3)    | 4434.3(16) | 4415.6(19) | 47(5)          |
| N3   | 2862(3)    | 4543.4(16) | 4109.6(16) | 23.0(14)       |
| C9   | 2860(2)    | 4868.8(16) | 4118.7(16) | 15.5(18)       |
| C6   | 2879(3)    | 4960.8(17) | 4430.4(19) | 15.5(18)       |
| C4   | 3146.0(16) | 4292.2(16) | 3292.7(17) | 34.0(17)       |
| N8   | 3280(4)    | 3850(4)    | 5000       | 115(5)         |
| O3   | 2861(4)    | 4149(3)    | 5000       | 164(8)         |
| C10  | 2964(6)    | 3906(6)    | 5000       | 118(7)         |
| C11  | 3456(7)    | 4118(6)    | 5000       | 330(40)        |
| N6   | 2843(3)    | 5387(3)    | 4019(2)    | 23.0(14)       |
| C8   | 2839(3)    | 5097(2)    | 3911(3)    | 18(2)          |
| N7   | 2820(2)    | 5048(4)    | 3613.1(19) | 26(3)          |
| C7   | 2865(3)    | 5449(3)    | 4322(3)    | 23(3)          |
| N5   | 2879(4)    | 5224(3)    | 4524(3)    | 42(4)          |
| C12  | 3428(12)   | 3567(5)    | 5000       | 290(30)        |

**Table S7.** Anisotropic displacement parameters ( $\text{\AA}^2 \times 10^3$ ) for **as-synthesized bMOF-200**. The anisotropic displacement factor exponent takes the form:  $-2\pi^2[h^2a^*U_{11}+2hka^*b^*U_{12}+\dots]$ .

| Atom | $U_{11}$ | $U_{22}$ | $U_{33}$ | $U_{23}$ | $U_{13}$ | $U_{12}$ |
|------|----------|----------|----------|----------|----------|----------|
| Zn1  | 19.9(6)  | 20.5(6)  | 21.7(6)  | 0.1(3)   | 1.6(3)   | 0.0(3)   |
| Cu1  | 131(2)   | 34.6(12) | 54.6(13) | 0        | 0        | -4.6(11) |
| O1   | 43(3)    | 45(3)    | 35(3)    | 5(2)     | 18(2)    | 7(2)     |
| N1   | 22(3)    | 29(3)    | 26(3)    | 2(2)     | 3(2)     | 4(2)     |
| N2   | 29(3)    | 26(3)    | 22(3)    | 7(2)     | 3(2)     | 6(2)     |
| O2   | 31(3)    | 65(4)    | 58(4)    | 6(3)     | 13(3)    | 17(3)    |
| C3   | 26(4)    | 29(4)    | 32(4)    | -1(3)    | 8(3)     | 4(3)     |
| C2   | 39(4)    | 36(4)    | 22(4)    | 6(3)     | 11(3)    | 5(3)     |
| C1   | 25(4)    | 39(4)    | 28(4)    | 4(3)     | 0(3)     | 6(3)     |
| N4   | 72(10)   | 21(3)    | 13(3)    | 7(2)     | -4(4)    | 1(3)     |
| C5   | 104(14)  | 22(3)    | 17(3)    | 6(2)     | -8(4)    | 3(4)     |
| N3   | 34(4)    | 20(3)    | 15(3)    | 3.3(15)  | -5(3)    | 0(2)     |
| C9   | 15(5)    | 20(3)    | 12(3)    | 4.1(15)  | -1(3)    | 0(2)     |
| C6   | 15(5)    | 20(3)    | 12(3)    | 4.1(15)  | -1(3)    | 0(2)     |
| C4   | 33(4)    | 32(4)    | 37(4)    | -5(3)    | 9(3)     | -4(3)    |
| N8   | 98(13)   | 74(11)   | 172(17)  | 0        | 0        | 0(9)     |
| O3   | 159(15)  | 30(7)    | 300(20)  | 0        | 0        | 24(8)    |
| C10  | 112(18)  | 95(17)   | 150(20)  | 0        | 0        | -9(13)   |
| C11  | 130(30)  | 79(19)   | 770(120) | 0        | 0        | -2(18)   |
| N6   | 34(4)    | 20(3)    | 15(3)    | 3.3(15)  | -5(3)    | 0(2)     |
| C8   | 22(6)    | 20(3)    | 13(2)    | 3.7(16)  | -3(3)    | -1(2)    |
| N7   | 45(5)    | 18(8)    | 14(2)    | 4(2)     | -6(3)    | -1(5)    |
| C7   | 37(7)    | 18(3)    | 15(3)    | 2.7(19)  | -5(4)    | 0(4)     |
| N5   | 93(11)   | 21(3)    | 13(3)    | 4.0(19)  | -7(4)    | 1(3)     |
| C12  | 670(90)  | 60(15)   | 120(20)  | 0        | 0        | 70(30)   |

**Table 8.** Bond lengths for **as-synthesized bMOF-200**.

| Atom | Atom             | Length/Å  | Atom | Atom | Length/Å  |
|------|------------------|-----------|------|------|-----------|
| Zn1  | O1               | 1.941(5)  | N4   | C5   | 1.4200    |
| Zn1  | N1 <sup>1</sup>  | 1.983(5)  | N4   | C6   | 1.4200    |
| Zn1  | N2 <sup>2</sup>  | 2.023(5)  | C5   | N3   | 1.4200    |
| Zn1  | N3               | 2.055(7)  | N3   | C9   | 1.4200    |
| Cu1  | Cu1 <sup>3</sup> | 2.878(4)  | C9   | C6   | 1.4200    |
| Cu1  | N4               | 1.688(6)  | C9   | C8   | 1.350(12) |
| Cu1  | O3               | 2.274(13) | C6   | N5   | 1.218(15) |
| O1   | C4               | 1.265(9)  | N8   | C10  | 1.40(3)   |
| N1   | N2               | 1.366(8)  | N8   | C11  | 1.40(3)   |
| N1   | C1               | 1.334(9)  | N8   | C12  | 1.40(3)   |
| N2   | C2               | 1.337(8)  | O3   | C10  | 1.15(2)   |
| O2   | C4               | 1.241(9)  | N6   | C8   | 1.348(15) |
| C3   | C2               | 1.367(10) | N6   | C7   | 1.356(17) |
| C3   | C1               | 1.372(10) | C8   | N7   | 1.319(15) |
| C3   | C4               | 1.485(9)  | C7   | N5   | 1.322(17) |

<sup>1</sup>1/2-Z,+Y,+X; <sup>2</sup>+Z,+X,+Y; <sup>3</sup>+X,1-Y,+Z

**Table S9.** Bond angles for **as-synthesized bMOF-200**.

| Atom            | Atom | Atom             | Angle/°  | Atom | Atom | Atom | Angle/°   |
|-----------------|------|------------------|----------|------|------|------|-----------|
| O1              | Zn1  | N1 <sup>1</sup>  | 128.9(2) | N4   | C5   | N3   | 108.0     |
| O1              | Zn1  | N2 <sup>2</sup>  | 96.5(2)  | C5   | N3   | Zn1  | 113.7(4)  |
| O1              | Zn1  | N3               | 110.4(3) | C5   | N3   | C9   | 108.0     |
| N1 <sup>1</sup> | Zn1  | N2 <sup>2</sup>  | 105.7(2) | C9   | N3   | Zn1  | 137.9(4)  |
| N1 <sup>1</sup> | Zn1  | N3               | 108.9(3) | N3   | C9   | C6   | 108.0     |
| N2 <sup>2</sup> | Zn1  | N3               | 102.3(3) | C8   | C9   | N3   | 136.0(7)  |
| N4              | Cu1  | Cu1 <sup>3</sup> | 86.7(3)  | C8   | C9   | C6   | 116.0(7)  |
| N4              | Cu1  | O3               | 93.3(3)  | N4   | C6   | C9   | 108.0     |
| O3              | Cu1  | Cu1 <sup>3</sup> | 177.8(4) | N5   | C6   | N4   | 125.9(7)  |
| C4              | O1   | Zn1              | 111.3(4) | N5   | C6   | C9   | 126.1(7)  |
| N2              | N1   | Zn1 <sup>4</sup> | 121.2(4) | O1   | C4   | C3   | 115.8(7)  |
| C1              | N1   | Zn1 <sup>4</sup> | 130.1(4) | O2   | C4   | O1   | 123.2(6)  |
| C1              | N1   | N2               | 108.3(5) | O2   | C4   | C3   | 121.0(7)  |
| N1              | N2   | Zn1 <sup>5</sup> | 128.2(4) | C10  | N8   | C11  | 113(2)    |
| C2              | N2   | Zn1 <sup>5</sup> | 124.9(4) | C12  | N8   | C10  | 128(3)    |
| C2              | N2   | N1               | 106.6(5) | C12  | N8   | C11  | 119(3)    |
| C2              | C3   | C1               | 104.5(6) | C10  | O3   | Cu1  | 154.7(18) |
| C2              | C3   | C4               | 127.3(7) | O3   | C10  | N8   | 123(2)    |
| C1              | C3   | C4               | 128.1(6) | C8   | N6   | C7   | 122.0(11) |
| N2              | C2   | C3               | 110.8(6) | N6   | C8   | C9   | 117.1(10) |
| N1              | C1   | C3               | 109.8(6) | N7   | C8   | C9   | 123.1(10) |
| C5              | N4   | Cu1              | 124.2(6) | N7   | C8   | N6   | 119.8(11) |
| C5              | N4   | C6               | 108.0    | N5   | C7   | N6   | 120.3(13) |
| C6              | N4   | Cu1              | 127.5(6) | C6   | N5   | C7   | 118.4(11) |

<sup>1</sup>1/2-Z,+Y,+X; <sup>2</sup>+Z,+X,+Y; <sup>3</sup>+X,1-Y,+Z; <sup>4</sup>+Z,+Y,1/2-X; <sup>5</sup>+Y,+Z,+X

**Table S10.** Torsion angles for as-synthesized bMOF-200.

| A                | B   | C   | D                | Angle/°    | A   | B   | C   | D  | Angle/°    |
|------------------|-----|-----|------------------|------------|-----|-----|-----|----|------------|
| Zn1              | O1  | C4  | O2               | 8.6(9)     | N4  | C6  | N5  | C7 | 180.0(11)  |
| Zn1              | O1  | C4  | C3               | -171.0(5)  | C5  | N4  | C6  | C9 | 0.0        |
| Zn1 <sup>1</sup> | N1  | N2  | Zn1 <sup>2</sup> | -0.4(7)    | C5  | N4  | C6  | N5 | 179.3(17)  |
| Zn1 <sup>1</sup> | N1  | N2  | C2               | -173.5(4)  | C5  | N3  | C9  | C6 | 0.0        |
| Zn1 <sup>1</sup> | N1  | C1  | C3               | 173.6(5)   | C5  | N3  | C9  | C8 | -178.6(13) |
| Zn1 <sup>2</sup> | N2  | C2  | C3               | -174.3(5)  | N3  | C9  | C6  | N4 | 0.0        |
| Zn1              | N3  | C9  | C6               | 171.9(11)  | N3  | C9  | C6  | N5 | -179.3(17) |
| Zn1              | N3  | C9  | C8               | -6.8(18)   | N3  | C9  | C8  | N6 | 179.3(9)   |
| Cu1 <sup>3</sup> | Cu1 | N4  | C5               | -176.6(7)  | N3  | C9  | C8  | N7 | -1.5(19)   |
| Cu1 <sup>3</sup> | Cu1 | N4  | C6               | -4.3(8)    | C9  | C6  | N5  | C7 | -1(2)      |
| Cu1              | N4  | C5  | N3               | 173.6(10)  | C6  | N4  | C5  | N3 | 0.0        |
| Cu1              | N4  | C6  | C9               | -173.3(10) | C6  | C9  | C8  | N6 | 0.8(13)    |
| Cu1              | N4  | C6  | N5               | 6.0(15)    | C6  | C9  | C8  | N7 | 179.9(9)   |
| Cu1              | O3  | C10 | N8               | 0.0        | C4  | C3  | C2  | N2 | 177.5(6)   |
| N1               | N2  | C2  | C3               | -1.0(8)    | C4  | C3  | C1  | N1 | -177.3(7)  |
| N2               | N1  | C1  | C3               | 0.7(8)     | O3  | Cu1 | N4  | C5 | 1.1(9)     |
| C2               | C3  | C1  | N1               | -1.2(8)    | O3  | Cu1 | N4  | C6 | 173.5(9)   |
| C2               | C3  | C4  | O1               | -6.7(11)   | C11 | N8  | C10 | O3 | 0.0        |
| C2               | C3  | C4  | O2               | 173.6(7)   | N6  | C7  | N5  | C6 | 2(2)       |
| C1               | N1  | N2  | Zn1 <sup>2</sup> | 173.2(5)   | C8  | C9  | C6  | N4 | 178.9(10)  |
| C1               | N1  | N2  | C2               | 0.2(7)     | C8  | C9  | C6  | N5 | -0.4(17)   |
| C1               | C3  | C2  | N2               | 1.4(8)     | C8  | N6  | C7  | N5 | -1(2)      |
| C1               | C3  | C4  | O1               | 168.4(7)   | C7  | N6  | C8  | C9 | 0.0(17)    |
| C1               | C3  | C4  | O2               | -11.2(12)  | C7  | N6  | C8  | N7 | -179.2(12) |
| N4               | C5  | N3  | Zn1              | -174.1(8)  | C12 | N8  | C10 | O3 | 180.0      |
| N4               | C5  | N3  | C9               | 0.0        |     |     |     |    |            |

<sup>1</sup>+Z,+Y,1/2-X; <sup>2</sup>+Y,+Z,+X; <sup>3</sup>+X,1-Y,+Z



**Table S11.** Hydrogen atom coordinates ( $\text{\AA} \times 10^4$ ) and isotropic displacement parameters ( $\text{\AA}^2 \times 10^3$ ) for **as-synthesized bMOF-200**.

| Atom | x       | y       | z       | U(eq) |
|------|---------|---------|---------|-------|
| H2   | 3710.21 | 3971.85 | 3298.73 | 39    |
| H1   | 3250.9  | 4424.61 | 2660.13 | 37    |
| H5   | 2887.92 | 4227.62 | 4476.26 | 57    |
| H10  | 2830.09 | 3737.91 | 5000    | 142   |
| H11A | 3454.03 | 4206.79 | 4796.1  | 489   |
| H11B | 3665.83 | 4074.19 | 5059.6  | 489   |
| H11C | 3366.53 | 4261.59 | 5144.3  | 489   |
| H7A  | 2810.14 | 5202.35 | 3487.06 | 31    |
| H7B  | 2818.03 | 4861.51 | 3542.64 | 31    |
| H7   | 2871    | 5653.66 | 4389.58 | 28    |
| H12A | 3598.34 | 3572.52 | 5143.27 | 428   |
| H12B | 3504.9  | 3523.53 | 4795.82 | 428   |
| H12C | 3285.13 | 3408.3  | 5060.91 | 428   |

**Table S12.** Atomic occupancy for **as-synthesized bMOF-200**.

| Atom | Occupancy | Atom | Occupancy | Atom | Occupancy |
|------|-----------|------|-----------|------|-----------|
| N4   | 0.5       | C5   | 0.5       | H5   | 0.5       |
| N3   | 0.5       | C9   | 0.5       | C6   | 0.25      |
| H11A | 0.5       | H11B | 0.5       | H11C | 0.5       |
| N6   | 0.5       | C8   | 0.5       | N7   | 0.5       |
| H7A  | 0.5       | H7B  | 0.5       | C7   | 0.5       |
| H7   | 0.5       | N5   | 0.5       | H12A | 0.5       |
| H12B | 0.5       | H12C | 0.5       |      |           |

## 7.2 MeOH-bMOF-200

Single crystal X-ray diffraction data for **MeOH-bMOF-200** was collected on a Bruker X8 Prospector Ultra diffractometer equipped with an Apex II CCD detector and an I $\mu$ S micro-focus CuK- $\alpha$  X-ray source ( $\lambda = 1.54178$  Å). A blue cubic crystal of dimensions 0.065 mm<sup>3</sup> was mounted on a goniometer using MiTeGen MicroMesh tips. Data was collected under N<sub>2</sub> stream at 150 K and processed using the Bruker APEX II software package.

A cubic unit cell with dimensions  $a = b = c = 43.571(5)$  Å,  $\alpha = \beta = \gamma = 90^\circ$ , was derived from least squares refinement of 59240 reflections in range of  $4.048^\circ < 2\theta < 107.766^\circ$ . Centrosymmetric space group  $Fm\bar{3}c$  was determined based on intensity statistics and systematic absences. The data were collected and integrated to 0.89 Å by Bruker program SAINT.<sup>14</sup> Empirical absorption correction was applied using program SADABS.<sup>14</sup> The structure was solved with direct method using SHELXT and refined by full-matrix least-squares on  $F^2$  using SHELXL in Olex2.<sup>15-17</sup> All the non-H atoms were refined anisotropically. All the H atoms were refined isotropically. The asymmetric unit is shown in **Figure S22**. Crystallographic data are summarized in **Tables S13-S20**.

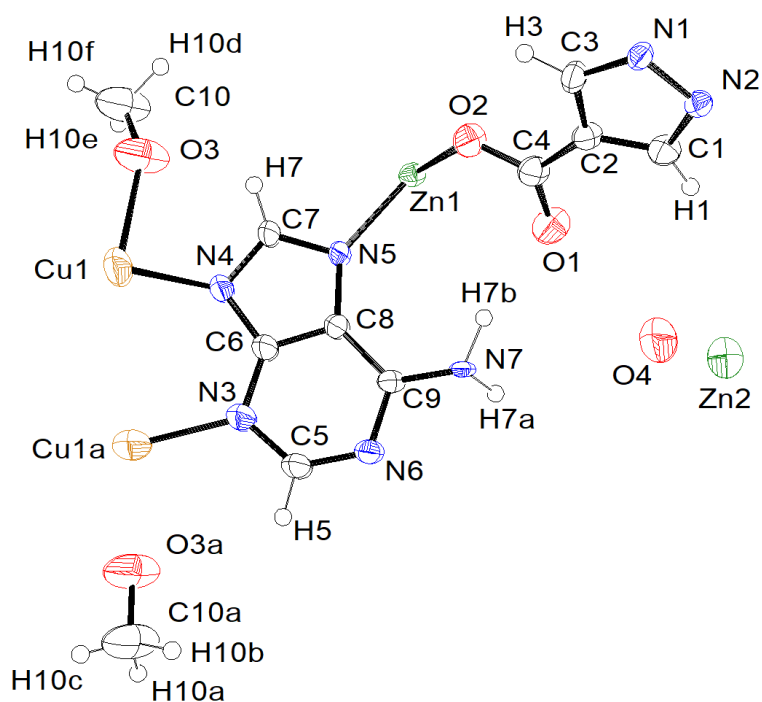

**Figure S20.** Asymmetric unit of **MeOH-bMOF-200** with all non-H atoms represented by thermal ellipsoids drawn at 50% probability level produced by ORTEP-3<sup>18</sup> (O, red; C, black; N, blue; Zn, green; Cu, gold; H, black spheres). In this structure, one Cu and one coordinating methanol are shown displaced over two positions, though the overall occupancy is still 0.5, which is consistent with the as-synthesized crystal structure.

**Table S13.** Crystal data and structure refinement for **MeOH-bMOF-200**.

|                                                |                                                                    |
|------------------------------------------------|--------------------------------------------------------------------|
| Identification code                            | <b>MeOH-bMOF-200</b>                                               |
| Empirical formula                              | $C_{13.75}H_{10.25}CuN_9O_{5.5}Zn_{2.08}$                          |
| Formula weight                                 | 589.29                                                             |
| Temperature/K                                  | 150                                                                |
| Crystal system                                 | cubic                                                              |
| Space group                                    | Fm-3c                                                              |
| a/Å                                            | 43.571(5)                                                          |
| b/Å                                            | 43.571(5)                                                          |
| c/Å                                            | 43.571(5)                                                          |
| $\alpha/^\circ$                                | 90                                                                 |
| $\beta/^\circ$                                 | 90                                                                 |
| $\gamma/^\circ$                                | 90                                                                 |
| Volume/Å <sup>3</sup>                          | 82717(28)                                                          |
| Z                                              | 96                                                                 |
| $\rho_{\text{calc}}/\text{cm}^3$               | 1.136                                                              |
| $\mu/\text{mm}^{-1}$                           | 2.675                                                              |
| F(000)                                         | 27960.0                                                            |
| Crystal size/mm <sup>3</sup>                   | 0.08 × 0.08 × 0.08                                                 |
| Radiation                                      | CuK $\alpha$ ( $\lambda = 1.54178$ )                               |
| 2 $\Theta$ range for data collection/ $^\circ$ | 4.056 to 102.648                                                   |
| Index ranges                                   | $-44 \leq h \leq 44$ , $-44 \leq k \leq 44$ , $-32 \leq l \leq 43$ |
| Reflections collected                          | 169200                                                             |
| Independent reflections                        | 1993 [ $R_{\text{int}} = 0.0850$ , $R_{\text{sigma}} = 0.0155$ ]   |
| Data/restraints/parameters                     | 1993/174/207                                                       |
| Goodness-of-fit on $F^2$                       | 1.159                                                              |
| Final R indexes [ $I \geq 2\sigma(I)$ ]        | $R_1 = 0.0461$ , $wR_2 = 0.1415$                                   |
| Final R indexes [all data]                     | $R_1 = 0.0505$ , $wR_2 = 0.1456$                                   |
| Largest diff. peak/hole / e Å <sup>-3</sup>    | 0.80/-0.54                                                         |

**Table S14.** Fractional Atomic Coordinates ( $\times 10^4$ ) and Equivalent Isotropic Displacement Parameters ( $\text{\AA}^2 \times 10^3$ ) for **MeOH-bMOF-200**. Ueq is defined as 1/3 of the trace of the orthogonalised UIJ tensor.

| Atom | x          | y          | z          | U(eq)    |
|------|------------|------------|------------|----------|
| Zn1  | 6202.0(2)  | 5797.0(2)  | 2798.8(2)  | 22.4(3)  |
| Cu1  | 5000       | 4670.0(3)  | 2912.2(6)  | 71.6(6)  |
| O2   | 6456.9(8)  | 5834.0(7)  | 3162.6(7)  | 38.1(9)  |
| N1   | 7142.4(8)  | 5953.3(8)  | 3820.2(8)  | 22.5(9)  |
| O1   | 6779.1(8)  | 5511.9(8)  | 2935.3(8)  | 46.3(10) |
| N2   | 7367.1(8)  | 5796.7(8)  | 3658.9(8)  | 23.7(9)  |
| C2   | 6935.0(11) | 5762.9(10) | 3393.3(10) | 26.9(11) |
| C3   | 6886.4(10) | 5932.9(11) | 3655.0(10) | 28.8(12) |
| C1   | 7239.0(11) | 5684.6(11) | 3406.2(11) | 29.4(12) |
| C4   | 6714.0(11) | 5693.6(11) | 3147.6(11) | 31.4(12) |
| N3   | 5979(2)    | 4607.5(18) | 2850(3)    | 30(2)    |
| C5   | 5680(2)    | 4557(3)    | 2878(3)    | 39(2)    |
| N4   | 5457(2)    | 4766.8(19) | 2901(3)    | 52(2)    |
| C6   | 5561.9(19) | 5056.3(15) | 2896.4(19) | 42.3(18) |
| C7   | 5864(2)    | 5141.0(17) | 2860(2)    | 28.3(16) |
| C8   | 6081(2)    | 4899.5(15) | 2837.9(18) | 22.9(17) |
| N5   | 6380.0(16) | 4944(4)    | 2813.1(17) | 28(5)    |
| N9   | 5886(2)    | 5451.0(17) | 2861(3)    | 26(2)    |
| C9   | 5596(2)    | 5540(3)    | 2909(3)    | 39(2)    |
| N11  | 5391(2)    | 5312.1(19) | 2919(3)    | 50(2)    |
| Zn2  | 7500       | 5000       | 2500       | 50.8(16) |
| O4   | 7194.7(18) | 5000       | 2957(2)    | 82(3)    |
| Cu1A | 5000       | 5355.7(14) | 3219(3)    | 78(3)    |
| O3   | 5000       | 4141(4)    | 2974(8)    | 89(5)    |
| C10A | 5000       | 3853(5)    | 3030(30)   | 89(5)    |
| C10  | 5000       | 6106(4)    | 3026(16)   | 89(5)    |
| O3A  | 5089.81    | 5852(3)    | 3122(5)    | 89(5)    |

**Table S15.** Anisotropic Displacement Parameters ( $\text{\AA}^2 \times 10^3$ ) for **MeOH-bMOF-200**. The Anisotropic displacement factor exponent takes the form:  $-2\pi^2[h^2a^2U_{11}+2hka^*b^*U_{12}+\dots]$ .

| Atom | $U_{11}$ | $U_{22}$ | $U_{33}$  | $U_{23}$ | $U_{13}$  | $U_{12}$ |
|------|----------|----------|-----------|----------|-----------|----------|
| Zn1  | 26.7(5)  | 19.7(4)  | 20.8(5)   | 0.4(2)   | -3.1(2)   | 2.3(2)   |
| Cu1  | 51.6(11) | 29.6(10) | 133.7(19) | -3.8(11) | 0         | 0        |
| O2   | 38(2)    | 41(2)    | 36(2)     | -4.9(15) | -15.3(16) | 7.0(17)  |
| N1   | 20(2)    | 24(2)    | 23(2)     | -4.1(17) | 0.0(17)   | 5.1(16)  |
| O1   | 51(2)    | 54(2)    | 34(2)     | -14(2)   | -13.0(18) | 11.3(19) |
| N2   | 22(2)    | 24(2)    | 25(2)     | -2.7(17) | 0.0(18)   | 2.3(16)  |
| C2   | 32(3)    | 25(3)    | 23(3)     | -1(2)    | -4(2)     | 4(2)     |
| C3   | 20(3)    | 35(3)    | 31(3)     | -4(2)    | -3(2)     | 5(2)     |
| C1   | 34(3)    | 34(3)    | 21(3)     | -6(2)    | 1(2)      | 3(2)     |
| C4   | 34(3)    | 29(3)    | 31(3)     | 2(2)     | -6(2)     | 5(2)     |
| N3   | 30(4)    | 20(3)    | 40(5)     | -3(3)    | -10(4)    | -1(2)    |
| C5   | 31(4)    | 20(4)    | 66(6)     | 3(4)     | -10(4)    | -2(2)    |
| N4   | 29(4)    | 22(3)    | 105(6)    | 4(4)     | -5(4)     | -2(2)    |
| C6   | 23(3)    | 21(3)    | 83(5)     | 2(3)     | -7(3)     | -0.3(18) |
| C7   | 22(3)    | 20(2)    | 43(4)     | 2(3)     | -10(3)    | 1.0(17)  |
| C8   | 27(3)    | 18(3)    | 23(4)     | -2(3)    | -11(3)    | 1.3(17)  |
| N5   | 26(4)    | 18(15)   | 40(4)     | -5(4)    | 10(3)     | -5(4)    |
| N9   | 17(3)    | 19(2)    | 40(5)     | 5(3)     | -11(4)    | 2(2)     |
| C9   | 18(4)    | 21(3)    | 79(6)     | 1(4)     | -7(4)     | 1(2)     |
| N11  | 20(3)    | 22(3)    | 107(6)    | 1(4)     | -5(4)     | -1(2)    |
| Zn2  | 46(2)    | 61(4)    | 46(2)     | 0        | 0         | 0        |
| O4   | 49(5)    | 66(6)    | 131(8)    | 0        | -24(5)    | 0        |
| Cu1A | 22(3)    | 42(4)    | 169(9)    | 12(5)    | 0         | 0        |
| O3   | 80(8)    | 36(5)    | 150(12)   | -4(8)    | -84(11)   | 11(7)    |
| C10A | 80(8)    | 36(5)    | 150(12)   | -4(8)    | -84(11)   | 11(7)    |
| C10  | 80(8)    | 36(5)    | 150(12)   | -4(8)    | -84(11)   | 11(7)    |
| O3A  | 80(8)    | 36(5)    | 150(12)   | -4(8)    | -84(11)   | 11(7)    |

**Table S16.** Bond Lengths for **MeOH-bMOF-200**.

| Atom | Atom              | Length/Å  | Atom | Atom            | Length/Å  |
|------|-------------------|-----------|------|-----------------|-----------|
| Zn1  | O2                | 1.942(3)  | C5   | N4              | 1.338(7)  |
| Zn1  | N1 <sup>1</sup>   | 2.006(4)  | N4   | C6              | 1.342(7)  |
| Zn1  | N2 <sup>2</sup>   | 1.976(4)  | C6   | C7              | 1.376(14) |
| Zn1  | N9                | 2.059(9)  | C6   | N11             | 1.345(7)  |
| Cu1  | Cu1 <sup>3</sup>  | 2.876(3)  | C7   | C8              | 1.419(11) |
| Cu1  | N4                | 2.036(9)  | C7   | N9              | 1.354(7)  |
| Cu1  | Cu1A <sup>3</sup> | 1.342(11) | C8   | N5              | 1.320(12) |
| Cu1  | O3                | 2.320(17) | N9   | C9              | 1.340(7)  |
| O2   | C4                | 1.278(6)  | C9   | N11             | 1.338(7)  |
| N1   | N2                | 1.385(5)  | N11  | Cu1A            | 2.155(13) |
| N1   | C3                | 1.330(6)  | Zn2  | O4 <sup>4</sup> | 2.396(10) |
| O1   | C4                | 1.250(6)  | Zn2  | O4 <sup>5</sup> | 2.396(10) |
| N2   | C1                | 1.328(6)  | Zn2  | O4 <sup>6</sup> | 2.396(10) |
| C2   | C3                | 1.376(6)  | Zn2  | O4              | 2.396(10) |
| C2   | C1                | 1.369(7)  | Cu1A | O3A             | 2.237(14) |
| C2   | C4                | 1.471(7)  | O3   | C10A            | 1.28(3)   |
| N3   | C5                | 1.330(7)  | C10  | O3A             | 1.25(3)   |
| N3   | C8                | 1.349(7)  |      |                 |           |

<sup>1</sup>+Y,1-Z,1-X; <sup>2</sup>1-Z,+Y,-1/2+X; <sup>3</sup>1-X,1-Y,+Z; <sup>4</sup>3/2-X,1-Y,1/2-Z; <sup>5</sup>1/2+Z,+Y,1-X; <sup>6</sup>1-Z,1-Y,-1/2+X

**Table S17. Bond Angles for MeOH-bMOF-200**

| Atom              | Atom | Atom             | Angle/°    | Atom             | Atom | Atom            | Angle/°   |
|-------------------|------|------------------|------------|------------------|------|-----------------|-----------|
| O2                | Zn1  | N1 <sup>1</sup>  | 97.80(14)  | C5               | N4   | Cu1             | 124.7(6)  |
| O2                | Zn1  | N2 <sup>2</sup>  | 126.98(15) | C5               | N4   | C6              | 113.2(8)  |
| O2                | Zn1  | N9               | 109.6(4)   | C6               | N4   | Cu1             | 121.9(7)  |
| N1 <sup>1</sup>   | Zn1  | N9               | 103.3(2)   | N4               | C6   | C7              | 125.4(7)  |
| N2 <sup>2</sup>   | Zn1  | N1 <sup>1</sup>  | 106.73(15) | N4               | C6   | N11             | 126.1(8)  |
| N2 <sup>2</sup>   | Zn1  | N9               | 109.3(4)   | N11              | C6   | C7              | 108.5(7)  |
| N4                | Cu1  | Cu1 <sup>3</sup> | 78.0(3)    | C6               | C7   | C8              | 116.6(7)  |
| N4                | Cu1  | O3               | 102.0(3)   | N9               | C7   | C6              | 109.6(8)  |
| Cu1A <sup>3</sup> | Cu1  | Cu1 <sup>3</sup> | 94.8(3)    | N9               | C7   | C8              | 133.8(9)  |
| Cu1A <sup>3</sup> | Cu1  | N4               | 92.3(4)    | N3               | C8   | C7              | 118.5(8)  |
| Cu1A <sup>3</sup> | Cu1  | O3               | 78.5(9)    | N5               | C8   | N3              | 117.9(11) |
| O3                | Cu1  | Cu1 <sup>3</sup> | 173.3(8)   | N5               | C8   | C7              | 123.6(10) |
| C4                | O2   | Zn1              | 114.8(3)   | C7               | N9   | Zn1             | 141.0(7)  |
| N2                | N1   | Zn1 <sup>4</sup> | 126.7(3)   | C9               | N9   | Zn1             | 116.0(6)  |
| C3                | N1   | Zn1 <sup>4</sup> | 126.4(3)   | C9               | N9   | C7              | 102.9(8)  |
| C3                | N1   | N2               | 106.6(3)   | N11              | C9   | N9              | 114.8(9)  |
| N1                | N2   | Zn1 <sup>5</sup> | 121.1(3)   | C6               | N11  | Cu1A            | 123.8(7)  |
| C1                | N2   | Zn1 <sup>5</sup> | 130.9(3)   | C9               | N11  | C6              | 104.1(8)  |
| C1                | N2   | N1               | 107.8(3)   | C9               | N11  | Cu1A            | 118.8(8)  |
| C3                | C2   | C4               | 127.8(4)   | O4 <sup>6</sup>  | Zn2  | O4 <sup>7</sup> | 90.000(1) |
| C1                | C2   | C3               | 104.4(4)   | O4               | Zn2  | O4 <sup>7</sup> | 180.0     |
| C1                | C2   | C4               | 127.7(4)   | O4 <sup>5</sup>  | Zn2  | O4 <sup>7</sup> | 90.000(2) |
| N1                | C3   | C2               | 110.8(4)   | O4 <sup>5</sup>  | Zn2  | O4              | 90.0      |
| N2                | C1   | C2               | 110.4(4)   | O4 <sup>6</sup>  | Zn2  | O4 <sup>5</sup> | 180.0(3)  |
| O2                | C4   | C2               | 116.0(4)   | O4 <sup>6</sup>  | Zn2  | O4              | 90.004(2) |
| O1                | C4   | O2               | 122.7(4)   | Cu1 <sup>3</sup> | Cu1A | N11             | 52.3(4)   |
| O1                | C4   | C2               | 121.3(4)   | Cu1 <sup>3</sup> | Cu1A | O3A             | 83.8(7)   |
| C5                | N3   | C8               | 118.9(9)   | C10A             | O3   | Cu1             | 177(7)    |
| N3                | C5   | N4               | 127.3(9)   | C10              | O3A  | Cu1A            | 150.1(9)  |

<sup>1</sup>+Y,1-Z,1-X; <sup>2</sup>1-Z,+Y,-1/2+X; <sup>3</sup>1-X,1-Y,+Z; <sup>4</sup>1-Z,+X,1-Y; <sup>5</sup>1/2+Z,+Y,1-X; <sup>6</sup>1-Z,1-Y,-1/2+X; <sup>7</sup>3/2-X,1-Y,1/2-Z



**Table S18.** Hydrogen Atom Coordinates ( $\text{\AA} \times 10^4$ ) and Isotropic Displacement Parameters ( $\text{\AA}^2 \times 10^3$ ) for **MeOH-bMOF-200**.

| Atom | x       | y       | z       | U(eq) |
|------|---------|---------|---------|-------|
| H3   | 6695.86 | 6023.47 | 3710.14 | 35    |
| H1   | 7343.53 | 5566.69 | 3255.5  | 35    |
| H5   | 5616.79 | 4348.21 | 2881.74 | 46    |
| H5A  | 6511.09 | 4872.43 | 2632.43 | 34    |
| H5B  | 6479.5  | 5162.88 | 2803.6  | 34    |
| H9   | 5539.74 | 5749.79 | 2933.46 | 47    |
| H10A | 5000    | 3739.51 | 2831.35 | 134   |
| H10B | 5183.6  | 3799.01 | 3143.85 | 134   |
| H10C | 4816.3  | 3799.01 | 3143.85 | 134   |
| H10D | 5164.9  | 6256.63 | 3049.52 | 134   |
| H10E | 4945.9  | 6087.13 | 2808.22 | 134   |
| H10F | 4819.7  | 6172.33 | 3142.52 | 134   |

**Table S19.** Atomic Occupancy for **MeOH-bMOF-200**.

| Atom | Occupancy | Atom | Occupancy | Atom | Occupancy |
|------|-----------|------|-----------|------|-----------|
| Cu1  | 0.8       | N3   | 0.5       | C5   | 0.5       |
| H5   | 0.5       | N4   | 0.5       | C6   | 0.5       |
| C7   | 0.5       | C8   | 0.5       | N5   | 0.5       |
| H5A  | 0.5       | H5B  | 0.5       | N9   | 0.5       |
| C9   | 0.5       | H9   | 0.5       | N11  | 0.5       |
| Zn2  | 0.3334    | O4   | 0.75      | Cu1A | 0.2       |
| O3   | 0.125     | C10A | 0.125     | H10A | 0.125     |
| H10B | 0.125     | H10C | 0.125     | C10  | 0.25      |
| H10D | 0.25      | H10E | 0.25      | H10F | 0.25      |
| O3A  | 0.25      |      |           |      |           |

**Table S20.** Solvent masks information for **MeOH-bMOF-200**.

| <b>Number</b> | <b>X</b> | <b>Y</b> | <b>Z</b> | <b>Volume</b> | <b>Electron count</b> | <b>Content</b> |
|---------------|----------|----------|----------|---------------|-----------------------|----------------|
| 1             | 0.000    | 0.000    | 0.000    | 2842.8        | 235.3                 | ?              |
| 2             | 0.000    | 0.000    | 0.500    | 2842.8        | 235.3                 | ?              |
| 3             | 0.000    | 0.500    | 0.000    | 2842.8        | 235.3                 | ?              |
| 4             | 0.000    | 0.500    | 0.500    | 2842.8        | 235.3                 | ?              |
| 5             | 0.250    | 0.250    | 0.250    | 2025.8        | 594.2                 | ?              |
| 6             | 0.250    | 0.250    | 0.750    | 2025.8        | 608.7                 | ?              |
| 7             | 0.250    | 0.750    | 0.250    | 2025.8        | 608.7                 | ?              |
| 8             | 0.250    | 0.750    | 0.750    | 2025.8        | 594.2                 | ?              |
| 9             | 0.500    | 0.000    | 0.500    | 2842.8        | 235.3                 | ?              |
| 10            | 0.500    | 0.000    | 0.000    | 2842.8        | 235.3                 | ?              |
| 11            | 0.500    | 0.500    | 0.500    | 2842.8        | 235.3                 | ?              |
| 12            | 0.500    | 0.500    | 0.000    | 2842.8        | 235.3                 | ?              |
| 13            | 0.750    | 0.250    | 0.250    | 2025.8        | 608.7                 | ?              |
| 14            | 0.750    | 0.250    | 0.750    | 2025.8        | 594.2                 | ?              |
| 15            | 0.750    | 0.750    | 0.250    | 2025.8        | 594.2                 | ?              |
| 16            | 0.750    | 0.750    | 0.750    | 2025.8        | 608.7                 | ?              |

### 7.3 bMOF-201

Single crystal X-ray diffraction data of **bMOF-201** were collected on a Bruker X8 Prospector Ultra diffractometer equipped with an Apex II CCD detector and an I $\mu$ S micro-focus CuK- $\alpha$  X-ray source ( $\lambda = 1.54178$  Å). A colorless cubic crystal of dimensions 0.065x0.065x0.065 mm<sup>3</sup> was mounted on a goniometer using MiTeGen MicroMesh tips. Data were collected under N<sub>2</sub> stream at 150 K and processed using the Bruker APEX II software package.

A cubic unit cell with dimensions  $a = b = c = 43.1097(5)$  Å,  $\alpha = \beta = \gamma = 90^\circ$ , was derived from least squares refinement of 9745 reflections in range of  $5.798^\circ < 2\theta < 117.966^\circ$ . Centrosymmetric space group  $Fm\bar{3}c$  was determined based on intensity statistics and systematic absences. The data were collected and integrated to 0.90 Å by Bruker program SAINT.<sup>14</sup> Empirical absorption correction was applied using program SADABS.<sup>14</sup> The structure was solved with direct method using SHELXT and refined by full-matrix least-squares on  $F^2$  using SHELXL in Olex2.<sup>15-17</sup> All the non-H atoms were refined anisotropically. All the H atoms were refined isotropically. Refinement details are included in the CIF. The asymmetric unit is shown in **Figure S23**. Crystallographic data are summarised in **Tables S21-S29**.

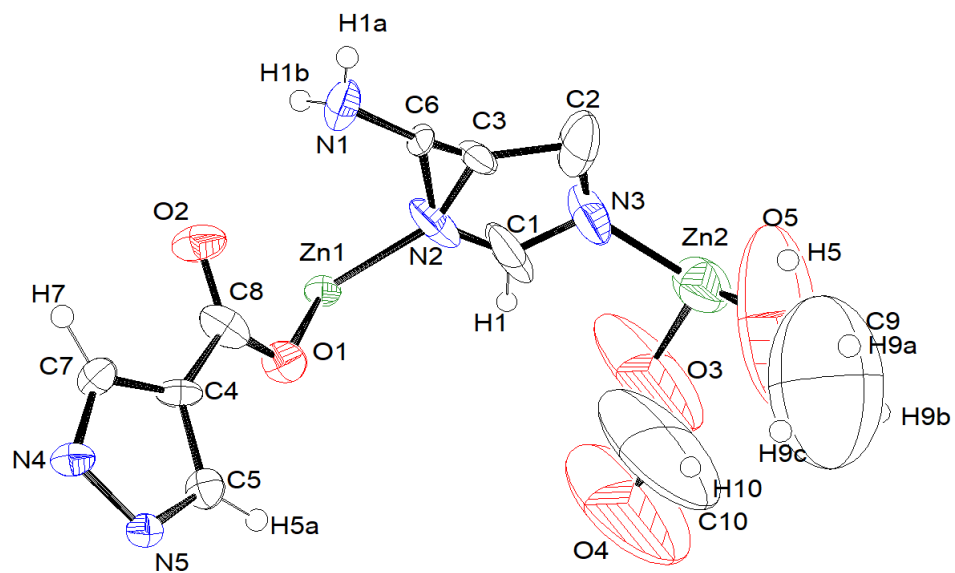

**Figure S21.** Asymmetric unit of **bMOF-201** with all non-H atoms represented by thermal ellipsoids drawn at 50% probability level produced by ORTEP-3<sup>18</sup> (O, red; C, black; N, blue; Zn, green; H, black spheres).

**Table S21.** Crystallographic data and structural refinement for **bMOF-201**.

|                                                |                                                               |
|------------------------------------------------|---------------------------------------------------------------|
| Identification code                            | <b>bMOF-201</b>                                               |
| Empirical formula                              | $C_{15}H_{13}N_9O_7Zn_3$                                      |
| Formula weight                                 | 627.45                                                        |
| Temperature/K                                  | 150.0                                                         |
| Crystal system                                 | cubic                                                         |
| Space group                                    | Fm-3c                                                         |
| a/Å                                            | 43.1097(5)                                                    |
| b/Å                                            | 43.1097(5)                                                    |
| c/Å                                            | 43.1097(5)                                                    |
| $\alpha/^\circ$                                | 90                                                            |
| $\beta/^\circ$                                 | 90                                                            |
| $\gamma/^\circ$                                | 90                                                            |
| Volume/Å <sup>3</sup>                          | 80117(3)                                                      |
| Z                                              | 96                                                            |
| $\rho_{\text{calc}}/\text{cm}^3$               | 1.248                                                         |
| $\mu/\text{mm}^{-1}$                           | 2.865                                                         |
| F(000)                                         | 29952.0                                                       |
| Crystal size/mm <sup>3</sup>                   | 0.65 × 0.65 × 0.65                                            |
| Radiation                                      | CuK $\alpha$ ( $\lambda = 1.54178$ )                          |
| 2 $\Theta$ range for data collection/ $^\circ$ | 4.1 to 117.928                                                |
| Index ranges                                   | -47 ≤ h ≤ 47, -47 ≤ k ≤ 37, -47 ≤ l ≤ 43                      |
| Reflections collected                          | 79464                                                         |
| Independent reflections                        | 2535 [R <sub>int</sub> = 0.0507, R <sub>sigma</sub> = 0.0132] |
| Data/restraints/parameters                     | 2535/33/178                                                   |
| Goodness-of-fit on F <sup>2</sup>              | 1.110                                                         |
| Final R indexes [ $I \geq 2\sigma(I)$ ]        | R <sub>1</sub> = 0.0814, wR <sub>2</sub> = 0.2406             |
| Final R indexes [all data]                     | R <sub>1</sub> = 0.0850, wR <sub>2</sub> = 0.2445             |
| Largest diff. peak/hole / e Å <sup>-3</sup>    | 2.13/-1.48                                                    |

**Table S22.** Fractional atomic coordinates ( $\times 10^4$ ) and equivalent isotropic displacement parameters ( $\text{\AA}^2 \times 10^3$ ) for **bMOF-201**.  $U_{\text{eq}}$  is defined as 1/3 of the trace of the orthogonalized  $U_{ij}$  tensor.

| Atom | x          | y          | z          | U(eq)    |
|------|------------|------------|------------|----------|
| Zn1  | 2800.1(2)  | 5786.6(2)  | 3817.8(2)  | 25.3(4)  |
| Zn2  | 3257.5(7)  | 5389.9(5)  | 5000       | 88.0(9)  |
| O1   | 3157.0(12) | 5810.8(13) | 3546.6(12) | 38.5(13) |
| O2   | 2932.3(13) | 5484.3(14) | 3221.6(14) | 45.6(14) |
| O3   | 3176(10)   | 5852(3)    | 5000       | 400(20)  |
| O4   | 3370(13)   | 6318(5)    | 5000       | 460(30)  |
| O5   | 3688(4)    | 5190(3)    | 5000       | 360(30)  |
| N1   | 2800(2)    | 5000       | 3653(2)    | 43(2)    |
| N2   | 2872.6(18) | 5428.2(18) | 4113(2)    | 58(2)    |
| N3   | 3017(2)    | 5273(2)    | 4611(2)    | 73(3)    |
| N4   | 3663.9(13) | 5777.4(13) | 2628.7(14) | 28.5(14) |
| N5   | 3822.5(13) | 5940.8(13) | 2860.4(13) | 25.9(13) |
| C1   | 2950(3)    | 5495(3)    | 4399(3)    | 82(4)    |
| C2   | 2980(4)    | 5000       | 4482(3)    | 73(5)    |
| C3   | 2884(4)    | 5136(3)    | 4177(4)    | 35(4)    |
| C4   | 3396.7(15) | 5740.8(16) | 3064.7(18) | 29.0(16) |
| C5   | 3656.6(17) | 5923.6(16) | 3117.6(17) | 30.2(16) |
| C6   | 2849(3)    | 5096(3)    | 3958(4)    | 23(3)    |
| C7   | 3411.8(17) | 5655.2(17) | 2756.4(16) | 30.3(16) |
| C8   | 3141.9(18) | 5669.8(18) | 3293(2)    | 38(2)    |
| C9   | 4040(6)    | 5182(14)   | 5000       | 410(40)  |
| C10  | 3404(10)   | 6022(7)    | 5000       | 450(30)  |

**Table S23.** Anisotropic displacement parameters ( $\text{\AA}^2 \times 10^3$ ) for **bMOF-201**. The anisotropic displacement factor exponent takes the form:  $-2\pi^2[h^2a^2U_{11}+2hka^*b^*U_{12}+\dots]$ .

| Atom | $U_{11}$ | $U_{22}$ | $U_{33}$ | $U_{23}$ | $U_{13}$ | $U_{12}$  |
|------|----------|----------|----------|----------|----------|-----------|
| Zn1  | 24.8(6)  | 21.5(6)  | 29.7(6)  | -2.8(4)  | 3.1(4)   | -0.2(4)   |
| Zn2  | 138(2)   | 63.8(14) | 62.3(14) | 0        | 0        | -17.4(14) |
| O1   | 34(3)    | 49(3)    | 33(3)    | -4(3)    | 13(2)    | -4(2)     |
| O2   | 36(3)    | 47(3)    | 54(4)    | -12(3)   | 10(3)    | -14(3)    |
| O3   | 1010(80) | 54(7)    | 134(16)  | 0        | 0        | -97(16)   |
| O4   | 1030(90) | 96(12)   | 260(30)  | 0        | 0        | -140(30)  |
| O5   | 500(60)  | 450(60)  | 119(17)  | 0        | 0        | 310(50)   |
| N1   | 32(5)    | 69(7)    | 27(5)    | 0        | -5(4)    | 0         |
| N2   | 55(5)    | 43(4)    | 76(6)    | 36(4)    | 18(4)    | 9(4)      |
| N3   | 101(7)   | 58(5)    | 61(6)    | 31(5)    | -3(5)    | 12(5)     |
| N4   | 24(3)    | 27(3)    | 35(3)    | -3(2)    | 3(2)     | -5(2)     |
| N5   | 27(3)    | 24(3)    | 27(3)    | 0(2)     | 0(3)     | -3(2)     |
| C1   | 83(8)    | 86(9)    | 77(9)    | 62(7)    | 15(7)    | 1(7)      |
| C2   | 75(11)   | 116(16)  | 28(7)    | 0        | -5(7)    | 0         |
| C3   | 48(10)   | 20(6)    | 35(10)   | 8(7)     | 4(8)     | -5(7)     |
| C4   | 18(3)    | 25(4)    | 44(4)    | -2(3)    | 6(3)     | -6(3)     |
| C5   | 34(4)    | 29(4)    | 27(4)    | -5(3)    | 2(3)     | 2(3)      |
| C6   | 39(8)    | 17(8)    | 14(7)    | -6(5)    | -6(6)    | -1(5)     |
| C7   | 27(4)    | 35(4)    | 30(4)    | -4(3)    | -4(3)    | -3(3)     |
| C8   | 31(4)    | 28(4)    | 54(5)    | 9(4)     | 18(4)    | 12(3)     |
| C9   | 500(60)  | 480(90)  | 240(50)  | 0        | 0        | 150(70)   |
| C10  | 1050(80) | 83(11)   | 200(30)  | 0        | 0        | -140(20)  |

**Table S24.** Bond lengths for **bMOF-201**.

| Atom | Atom            | Length/Å  | Atom | Atom            | Length/Å  |
|------|-----------------|-----------|------|-----------------|-----------|
| Zn1  | O1              | 1.935(5)  | N2   | C6              | 1.584(15) |
| Zn1  | N2              | 2.027(7)  | N3   | C1              | 1.358(13) |
| Zn1  | N4 <sup>1</sup> | 1.964(6)  | N3   | C2              | 1.312(11) |
| Zn1  | N5 <sup>2</sup> | 1.998(6)  | N4   | N5              | 1.400(8)  |
| Zn2  | O3              | 2.023(15) | N4   | C7              | 1.327(9)  |
| Zn2  | O5              | 2.046(17) | N5   | C5              | 1.321(9)  |
| Zn2  | N3              | 2.033(10) | C2   | C3 <sup>4</sup> | 1.50(2)   |
| Zn2  | N3 <sup>3</sup> | 2.033(10) | C2   | C3              | 1.50(2)   |
| O1   | C8              | 1.251(10) | C3   | C3 <sup>4</sup> | 1.18(3)   |
| O2   | C8              | 1.246(10) | C3   | C6              | 0.973(19) |
| O3   | C10             | 1.23(2)   | C3   | C6 <sup>4</sup> | 1.387(19) |
| O4   | C10             | 1.285(19) | C4   | C5              | 1.389(10) |
| O5   | C9              | 1.519(19) | C4   | C7              | 1.381(10) |
| N1   | C6              | 1.394(17) | C4   | C8              | 1.508(10) |
| N2   | C1              | 1.307(16) | C6   | C6 <sup>4</sup> | 0.83(2)   |
| N2   | C3              | 1.288(17) |      |                 |           |

<sup>1</sup>+X, +Z, 1/2-Y; <sup>2</sup>1+Z, -1+X, +Y; <sup>3</sup>2-X, -Y, +Z; <sup>4</sup>+X, -Y, +Z; <sup>5</sup>2-X, +Y, +Z; <sup>6</sup>+X, 1/2-Z, +Y; <sup>7</sup>1+Y, +Z, -1+X



**Table S25.** Bond Angles for **bMOF-201**.

| Atom            | Atom | Atom             | Angle(°)  | Atom            | Atom | Atom            | Angle(°)  |
|-----------------|------|------------------|-----------|-----------------|------|-----------------|-----------|
| O1              | Zn1  | N2               | 107.3(3)  | C3 <sup>6</sup> | C2   | C3              | 46.3(14)  |
| O1              | Zn1  | N4 <sup>1</sup>  | 123.1(2)  | N2              | C3   | C2              | 125.5(15) |
| O1              | Zn1  | N5 <sup>2</sup>  | 99.6(2)   | N2              | C3   | C6 <sup>6</sup> | 123.9(14) |
| N4 <sup>1</sup> | Zn1  | N2               | 110.0(3)  | C3 <sup>6</sup> | C3   | N2              | 167.5(10) |
| N4 <sup>1</sup> | Zn1  | N5 <sup>2</sup>  | 108.4(2)  | C3 <sup>6</sup> | C3   | C2              | 66.9(7)   |
| N5 <sup>2</sup> | Zn1  | N2               | 107.2(3)  | C3 <sup>6</sup> | C3   | C6 <sup>6</sup> | 43.6(8)   |
| O3              | Zn2  | O5               | 124.9(12) | C6              | C3   | N2              | 87.8(13)  |
| O3              | Zn2  | N3               | 99.0(7)   | C6 <sup>6</sup> | C3   | C2              | 110.1(11) |
| O3              | Zn2  | N3 <sup>3</sup>  | 99.0(7)   | C6              | C3   | C2              | 145.7(17) |
| N3              | Zn2  | O5               | 110.9(3)  | C6              | C3   | C3 <sup>6</sup> | 79.8(11)  |
| N3 <sup>3</sup> | Zn2  | O5               | 110.9(3)  | C6              | C3   | C6 <sup>6</sup> | 36.1(12)  |
| N3 <sup>3</sup> | Zn2  | N3               | 111.0(6)  | C5              | C4   | C8              | 126.6(7)  |
| C8              | O1   | Zn1              | 117.3(5)  | C7              | C4   | C5              | 105.8(6)  |
| C10             | O3   | Zn2              | 117(2)    | C7              | C4   | C8              | 127.6(7)  |
| C9              | O5   | Zn2              | 156(2)    | N5              | C5   | C4              | 109.3(6)  |
| C1              | N2   | Zn1              | 117.6(8)  | N1 <sup>6</sup> | C6   | N1              | 0.0(8)    |
| C1              | N2   | C6               | 127.9(9)  | N1 <sup>6</sup> | C6   | N2              | 132.7(10) |
| C3              | N2   | Zn1              | 152.1(11) | N1              | C6   | N2              | 132.7(10) |
| C3              | N2   | C1               | 90.3(11)  | C3 <sup>6</sup> | C6   | N1 <sup>6</sup> | 116.3(10) |
| C3              | N2   | C6               | 37.9(9)   | C3 <sup>6</sup> | C6   | N1              | 116.3(10) |
| C6              | N2   | Zn1              | 114.4(7)  | C3              | C6   | N1              | 172.9(15) |
| C1              | N3   | Zn2              | 119.3(9)  | C3              | C6   | N1 <sup>6</sup> | 172.9(15) |
| C2              | N3   | Zn2              | 129.6(8)  | C3 <sup>6</sup> | C6   | N2              | 111.0(10) |
| C2              | N3   | C1               | 108.5(11) | C3              | C6   | N2              | 54.4(11)  |
| N5              | N4   | Zn1 <sup>4</sup> | 119.7(4)  | C3              | C6   | C3 <sup>6</sup> | 56.6(15)  |
| C7              | N4   | Zn1 <sup>4</sup> | 132.4(5)  | C6 <sup>6</sup> | C6   | N1 <sup>6</sup> | 72.7(5)   |
| C7              | N4   | N5               | 107.7(6)  | C6 <sup>6</sup> | C6   | N1              | 72.7(5)   |
| N4              | N5   | Zn1 <sup>5</sup> | 125.5(4)  | C6 <sup>6</sup> | C6   | N2              | 154.6(6)  |
| C5              | N5   | Zn1 <sup>5</sup> | 126.5(5)  | C6 <sup>6</sup> | C6   | C3 <sup>6</sup> | 43.7(8)   |
| C5              | N5   | N4               | 107.8(5)  | C6 <sup>6</sup> | C6   | C3              | 100.2(11) |
| N2              | C1   | N3               | 122.3(13) | N4              | C7   | C4              | 109.4(6)  |
| N3              | C2   | N3 <sup>6</sup>  | 127.2(13) | O1              | C8   | C4              | 115.7(7)  |
| N3              | C2   | C3 <sup>6</sup>  | 139.5(11) | O2              | C8   | O1              | 124.5(7)  |
| N3 <sup>6</sup> | C2   | C3               | 139.5(11) | O2              | C8   | C4              | 119.7(7)  |
| N3              | C2   | C3               | 93.2(8)   | O3              | C10  | O4              | 120(3)    |
| N3 <sup>6</sup> | C2   | C3 <sup>6</sup>  | 93.2(8)   |                 |      |                 |           |

<sup>1</sup>+X, +Z, 1/2-Y; <sup>2</sup>1+Z, -1+X, +Y; <sup>3</sup>2-X, -Y, +Z; <sup>4</sup>+X, -Y, +Z; <sup>5</sup>2-X, +Y, +Z; <sup>6</sup>+X, 1/2-Z, +Y; <sup>7</sup>1+Y, +Z, -1+X

**Table S26.** Torsion angles for **bMOF-201**.

| <b>A</b>         | <b>B</b> | <b>C</b> | <b>D</b>         | <b>Angle(°)</b> | <b>A</b>        | <b>B</b> | <b>C</b> | <b>D</b>         | <b>Angle(°)</b> |
|------------------|----------|----------|------------------|-----------------|-----------------|----------|----------|------------------|-----------------|
| Zn1              | O1       | C8       | O2               | -9.7(10)        | C1              | N2       | C6       | N1 <sup>1</sup>  | -172.6(13)      |
| Zn1              | O1       | C8       | C4               | 169.2(5)        | C1              | N2       | C6       | C3 <sup>1</sup>  | 7.5(18)         |
| Zn1              | N2       | C1       | N3               | -176.9(9)       | C1              | N2       | C6       | C3               | 7.2(18)         |
| Zn1              | N2       | C3       | C2               | 176.8(12)       | C1              | N2       | C6       | C6 <sup>1</sup>  | 8(2)            |
| Zn1              | N2       | C3       | C3 <sup>1</sup>  | 5(5)            | C1              | N3       | C2       | N3 <sup>1</sup>  | -178.9(14)      |
| Zn1              | N2       | C3       | C6               | 6(3)            | C1              | N3       | C2       | C3               | 0.0(14)         |
| Zn1              | N2       | C3       | C6 <sup>1</sup>  | 6(3)            | C1              | N3       | C2       | C3 <sup>1</sup>  | -1(3)           |
| Zn1              | N2       | C6       | N1               | 3.1(17)         | C2              | N3       | C1       | N2               | -2.3(17)        |
| Zn1              | N2       | C6       | N1 <sup>1</sup>  | 3.1(17)         | C2              | C3       | C6       | N2               | -167(4)         |
| Zn1              | N2       | C6       | C3 <sup>1</sup>  | -176.8(10)      | C2              | C3       | C6       | C3 <sup>1</sup>  | 13(3)           |
| Zn1              | N2       | C6       | C3               | -177.1(14)      | C2              | C3       | C6       | C6 <sup>1</sup>  | 13(3)           |
| Zn1              | N2       | C6       | C6 <sup>1</sup>  | -176.4(9)       | C3              | N2       | C1       | N3               | 3.1(14)         |
| Zn1 <sup>2</sup> | N4       | N5       | Zn1 <sup>3</sup> | -2.1(7)         | C3              | N2       | C6       | N1               | -180(100)       |
| Zn1 <sup>2</sup> | N4       | N5       | C5               | 173.7(5)        | C3              | N2       | C6       | N1 <sup>1</sup>  | -180(100)       |
| Zn1 <sup>2</sup> | N4       | C7       | C4               | -174.0(5)       | C3              | N2       | C6       | C3 <sup>1</sup>  | 0.2(6)          |
| Zn1 <sup>3</sup> | N5       | C5       | C4               | 178.2(5)        | C3              | N2       | C6       | C6 <sup>1</sup>  | 0.6(15)         |
| Zn2              | O3       | C10      | O4               | 180.0           | C3 <sup>1</sup> | C2       | C3       | N2               | -178.2(12)      |
| Zn2              | N3       | C1       | N2               | 161.4(8)        | C3 <sup>1</sup> | C2       | C3       | C6 <sup>1</sup>  | -5.9(15)        |
| Zn2              | N3       | C2       | N3 <sup>1</sup>  | 20(3)           | C3 <sup>1</sup> | C2       | C3       | C6               | -14(4)          |
| Zn2              | N3       | C2       | C3               | -161.4(10)      | C3 <sup>1</sup> | C3       | C6       | N2               | 179.7(7)        |
| Zn2              | N3       | C2       | C3 <sup>1</sup>  | -162.0(17)      | C3 <sup>1</sup> | C3       | C6       | C6 <sup>1</sup>  | 0.004(5)        |
| N2               | C3       | C6       | C3 <sup>1</sup>  | -179.7(6)       | C5              | C4       | C7       | N4               | -0.1(8)         |
| N2               | C3       | C6       | C6 <sup>1</sup>  | -179.7(7)       | C5              | C4       | C8       | O1               | 6.0(11)         |
| N3 <sup>1</sup>  | C2       | C3       | N2               | -179.0(18)      | C5              | C4       | C8       | O2               | -175.0(7)       |
| N3               | C2       | C3       | N2               | 2(2)            | C6              | N2       | C1       | N3               | -1.3(18)        |
| N3               | C2       | C3       | C3 <sup>1</sup>  | -179.5(12)      | C6              | N2       | C3       | C2               | 171(3)          |
| N3 <sup>1</sup>  | C2       | C3       | C3 <sup>1</sup>  | -0.8(19)        | C6              | N2       | C3       | C3 <sup>1</sup>  | -1(3)           |
| N3               | C2       | C3       | C6               | 166(3)          | C6              | N2       | C3       | C6 <sup>1</sup>  | -0.2(5)         |
| N3 <sup>1</sup>  | C2       | C3       | C6 <sup>1</sup>  | -7(3)           | C6 <sup>1</sup> | C3       | C6       | N2               | 179.7(7)        |
| N3               | C2       | C3       | C6 <sup>1</sup>  | 174.6(13)       | C6 <sup>1</sup> | C3       | C6       | C3 <sup>1</sup>  | -0.004(11)      |
| N3 <sup>1</sup>  | C2       | C3       | C6               | -15(5)          | C7              | N4       | N5       | Zn1 <sup>3</sup> | -178.3(5)       |
| N4               | N5       | C5       | C4               | 2.4(8)          | C7              | N4       | N5       | C5               | -2.5(8)         |
| N5               | N4       | C7       | C4               | 1.5(8)          | C7              | C4       | C5       | N5               | -1.5(8)         |
| C1               | N2       | C3       | C2               | -3.3(18)        | C7              | C4       | C8       | O1               | -169.7(7)       |
| C1               | N2       | C3       | C3 <sup>1</sup>  | -176(4)         | C7              | C4       | C8       | O2               | 9.3(12)         |
| C1               | N2       | C3       | C6 <sup>1</sup>  | -174.5(16)      | C8              | C4       | C5       | N5               | -178.0(7)       |
| C1               | N2       | C3       | C6               | -174.3(14)      | C8              | C4       | C7       | N4               | 176.3(7)        |
| C1               | N2       | C6       | N1               | -172.6(13)      |                 |          |          |                  |                 |

**Table S27.** Hydrogen atom coordinates ( $\text{\AA} \times 10^4$ ) and isotropic displacement parameters ( $\text{\AA}^2 \times 10^3$ ) for **bMOF-201**.

| <b>Atom</b> | <b>x</b> | <b>y</b> | <b>z</b> | <b>U(eq)</b> |
|-------------|----------|----------|----------|--------------|
| H5          | 3620(6)  | 5000     | 5000     | 535          |
| H1A         | 2787.78  | 4817.69  | 3618.69  | 51           |
| H1B         | 2623.55  | 5106.99  | 3594.66  | 51           |
| H1          | 2958.57  | 5706.54  | 4459.73  | 98           |
| H5A         | 3707.27  | 6020.91  | 3308.68  | 36           |
| H7          | 3264.74  | 5528.55  | 2651.99  | 36           |
| H9A         | 4110.79  | 4969.81  | 4957.78  | 610          |
| H9B         | 4117.2   | 5248.37  | 5203.08  | 610          |
| H9C         | 4118.88  | 5321.47  | 4839.13  | 610          |
| H10         | 3606.35  | 5934.27  | 5000     | 534          |

**Table S28.** Atomic Occupancy for **bMOF-201**

| <b>Atom</b> | <b>Occupancy</b> | <b>Atom</b> | <b>Occupancy</b> | <b>Atom</b> | <b>Occupancy</b> |
|-------------|------------------|-------------|------------------|-------------|------------------|
| H5          | 2                | H1A         | 0.5              | H1B         | 0.5              |
| C3          | 0.5              | C6          | 0.5              | H9A         | 0.5              |
| H9B         | 0.5              | H9C         | 0.5              |             |                  |

**Table S29.** Solvent masks information for **bMOF-201**

| <b>Number</b> | <b>x</b> | <b>y</b> | <b>z</b> | <b>Volume</b> | <b>Electron count</b> | <b>Content</b> |
|---------------|----------|----------|----------|---------------|-----------------------|----------------|
| 1             | -0.753   | -0.960   | -0.173   | 34730.4       | 3276.6                | ?              |
| 2             | 0.000    | 0.000    | 0.250    | 11.6          | 2.0                   | ?              |
| 3             | 0.000    | 0.000    | 0.750    | 11.6          | 2.0                   | ?              |
| 4             | 0.000    | 0.250    | 0.000    | 11.6          | 2.0                   | ?              |
| 5             | 0.000    | 0.250    | 0.500    | 11.6          | 2.0                   | ?              |
| 6             | 0.000    | 0.500    | 0.250    | 11.6          | 2.0                   | ?              |
| 7             | 0.000    | 0.500    | 0.750    | 11.6          | 2.0                   | ?              |
| 8             | 0.000    | 0.750    | 0.000    | 11.6          | 2.0                   | ?              |
| 9             | 0.000    | 0.750    | 0.500    | 11.6          | 2.0                   | ?              |
| 10            | 0.250    | 0.000    | 0.000    | 11.6          | 2.0                   | ?              |
| 11            | 0.250    | 0.000    | 0.500    | 11.6          | 2.0                   | ?              |
| 12            | 0.250    | 0.500    | 0.000    | 11.6          | 2.0                   | ?              |
| 13            | 0.250    | 0.500    | 0.500    | 11.6          | 2.0                   | ?              |
| 14            | 0.500    | 0.000    | 0.250    | 11.6          | 2.0                   | ?              |
| 15            | 0.500    | 0.000    | 0.750    | 11.6          | 2.0                   | ?              |
| 16            | 0.500    | 0.250    | 0.500    | 11.6          | 2.0                   | ?              |
| 17            | 0.500    | 0.250    | 0.000    | 11.6          | 2.0                   | ?              |
| 18            | 0.500    | 0.500    | 0.250    | 11.6          | 2.0                   | ?              |
| 19            | 0.500    | 0.500    | 0.750    | 11.6          | 2.0                   | ?              |
| 20            | 0.500    | 0.750    | 0.000    | 11.6          | 2.0                   | ?              |
| 21            | 0.500    | 0.750    | 0.500    | 11.6          | 2.0                   | ?              |
| 22            | 0.750    | 0.000    | 0.000    | 11.6          | 2.0                   | ?              |
| 23            | 0.750    | 0.000    | 0.500    | 11.6          | 2.0                   | ?              |
| 24            | 0.750    | 0.500    | 0.500    | 11.6          | 2.0                   | ?              |
| 25            | 0.750    | 0.500    | 0.000    | 11.6          | 2.0                   | ?              |

## References

1. S. Stoll and A. Schweiger, *J. Magn. Reson.*, 2006, **178**, 42-55.
2. J. VandeVondele, M. Krack, F. Mohamed, M. Parrinello, T. Chassaing and J. Hutter, *Comput. Phys. Commun.*, 2005, **167** (2), 103-128.
3. J. P. Perdew, K. Burke and M. Ernzerhof, *Phys. Rev. Lett.*, 1996, **77** (18), 3865-3868.
4. S. Grimme, J. Antony, S. Ehrlich and H. Krieg, *J. Chem. Phys.*, 2010, **132** (15), 154104.
5. J. VandeVondele and J. Hutter, *J. Chem. Phys.*, 2007, **127**, 114105.
6. G. Henkelman and H. Jónsson, *J. Chem. Phys.*, 2000, **113**, 9978.
7. G. Henkelman and H. Jónsson, *J. Chem. Phys.*, 2000, **113**, 9901.
8. J. Wellendorff, K. T. Lundgaard, A. Møgelhøj, V. Petzold, D. D. Landis, J. K. Nørskov, T. Bligaard and K. W. Jacobsen, *Physical Review B*, 2012, **85**, 235149.
9. L. Gráfová, M. Pitoňák, J. Řezáč and P. Hobza, *Journal of Chemical Theory and Computation*, 2010, **6**, 2365-2376.
10. L. Li, Y. Yang, M. H. Mohamed, S. Zhang, G. Veser, N. L. Rosi and J. K. Johnson, *Organometallics*, 2019, **38**, 3453-3459.
11. G. C. Shearer, J. G. Vitillo, S. Bordiga, S. Svelle, U. Olsbye and K. P. Lillerud, *Chem. Mater.*, 2016, **28**, 7190-7193.
12. N. C. Jeong, B. Samanta, C. Y. Lee, O. K. Farha and J. T. Hupp, *J. Am. Chem. Soc.*, 2012, **134**, 51-54.
13. K. S. Park, Z. Ni, A. P. Côté, J. Y. Choi, R. Huang, F. J. Uribe-Romo, H. K. Chae, M. O'Keeffe and O. M. Yaghi, *Proc. Natl. Acad. Sci.*, 2006, **103**, 10186.
14. APEX2, SAINT, and SADABS; Bruker AXS Inc.: Madison WI, USA, 2014.
15. G.M. Sheldrick, *Acta Crystallogr.*, 2015, **A71**, 3-8.
16. G.M. Sheldrick, *Acta Crystallogr.*, 2015, **C71**, 3-8.
17. O. V. Dolomanov, L. J. Bourhis, R.J. Gildea, J. A. K. Howard and H. Puschmann, *J. Appl. Crystallogr.*, **2009**, 42, 339-341.
18. M. N. Burnett and C. K. Johnson, ORTEP-III: Oak Ridge Thermal Ellipsoid Plot Program for Crystal Structure Illustrations, Oak Ridge National Laboratory Report ORNL-6895, 1996.
